# Supplementary material for: Theoretical calculation of regioselectivity and solvation effects on B–H activation of O-carborane guided by directing group
Source: Royal Society of Chemistry journal article supplement (doi:10.1039/d1dt00810b), 2021-01-01
Supplement: d1dt00810b1.pdf [file d1dt00810b1.pdf]

## DFT Calculations on Regioselectivity and Solvation effect in B-H Activation of O-carborane Guided by Directing group

Hui Li,<sup>\*a,b</sup> Wanyong Tang<sup>a</sup> and Zifan Ma<sup>a</sup>

<sup>a</sup> Chemical Science and Engineering College, North Minzu University, Wenchang North Street 204<sup>th</sup>, Yinchuan 750021, P. R. China

\* Corresponding author. Hui Li

E-mail: lihui@nun.edu.cn

### Supporting Information

#### Table of Contents

|                                                                                                                                                                                    |     |
|------------------------------------------------------------------------------------------------------------------------------------------------------------------------------------|-----|
| Table S1. Energies calculated at $\omega$ B97X-D/BSI (6-311g**, SDD) level in gas phase of Path A, path C, and path B.                                                             | S2  |
| Table S2. Correction energies calculated at $\omega$ B97X-D/BSII (6-311g**, SDD) of Path A, path B, and path C.                                                                    | S4  |
| Table S3. Energies calculated at $\omega$ B97X-D/BSI (6-311g**, SDD) level in gas phase of Path D, Path E, and path F.                                                             | S6  |
| Table S4. Correction energies calculated at $\omega$ B97X-D/BSII (6-311g**, SDD) of Path D, Path E, and path F in DCE.                                                             | S7  |
| Table S5. Correction energies calculated at $\omega$ B97X-D/BSII (6-311g**, SDD) of Path D, Path E, and path F in MeCN.                                                            | S8  |
| Figure S1. Reaction mechanism of B(4)-H/B(7)-H/B(8)-H activation in Path A/B/C.                                                                                                    | S9  |
| Figure S2. Reaction mechanism of B(7)-H/B(8)-H activation in cation pathways (PathD/E/F) catalyzed by Pd <sup>II</sup> that 1, 10-o-phenanthroline as ligand.                      | S10 |
| Figure S3. IRC profiles of all TSs in the pathways (a. IRC A1-A2, b. IRC A2-A3, c. IRC A3-A4, d. IRC B1-B2, e. IRC B2-B3, f. IRC B3-B4, g. IRC C1-C2, h. IRC C2-C3, i. IRC C3-C4). | S11 |
| Cartesian coordinates of all stationary points optimized at $\omega$ B97X-D/BSI (6-311g**, SDD) level.                                                                             | S12 |

**Table S1. Energies calculated at  $\omega$ B97X-D/BSI (6-311g\*\*, SDD) level in gas phase of Path A, path B, and path C. (unit: a.u.)**

|                     | <i>E+ZPE</i> | <i>E</i>     | <i>H</i>     | <i>G</i>     |
|---------------------|--------------|--------------|--------------|--------------|
| <b>L</b>            | -571.35899   | -571.349882  | -571.348937  | -571.393671  |
| <b>CATA1</b>        | -1317.749617 | -1317.735857 | -1317.734913 | -1317.794056 |
| <b>I-Pd-OTf</b>     | -1100.73328  | -1100.722996 | -1100.722052 | -1100.773813 |
| <b>I-Pd-OTf-DCE</b> | -2099.75554  | -2099.73826  | -2099.737316 | -2099.807653 |
| <b>DCE</b>          | -998.976814  | -998.971967  | -998.971023  | -999.005086  |
| <b>OTf_ion</b>      | -961.491852  | -961.484825  | -961.483881  | -961.524164  |
| <b>HOAc</b>         | -229.017442  | -229.013698  | -229.012754  | -229.043449  |
| <b>Ph-I</b>         | -242.94425   | -242.938453  | -242.937509  | -242.975897  |
| <b>1</b>            | -618.47775   | -618.462542  | -618.461597  | -618.517429  |
| <b>A1</b>           | -1936.256776 | -1936.226469 | -1936.225525 | -1936.316876 |
| <b>TSA1-A2</b>      | -1936.232593 | -1936.202188 | -1936.201243 | -1936.293406 |
| <b>A2</b>           | -1707.250039 | -1707.224856 | -1707.223912 | -1707.305089 |
| <b>TSA2-A3</b>      | -1950.175269 | -1950.1426   | -1950.141656 | -1950.241069 |
| <b>A3</b>           | -1950.213665 | -1950.181146 | -1950.180201 | -1950.277155 |
| <b>TSA3-A4</b>      | -1950.201012 | -1950.1695   | -1950.168555 | -1950.262885 |
| <b>A4</b>           | -849.431442  | -849.411207  | -849.410263  | -849.47818   |
| <b>B1</b>           | -1936.249549 | -1936.219737 | -1936.218793 | -1936.309126 |
| <b>TSB1-B2</b>      | -1936.224304 | -1936.194005 | -1936.193061 | -1936.285443 |
| <b>B2</b>           | -1707.250983 | -1707.2256   | -1707.224655 | -1707.306389 |
| <b>TSB2-B3</b>      | -1950.191926 | -1950.159739 | -1950.158795 | -1950.255145 |
| <b>B3</b>           | -1950.21176  | -1950.179492 | -1950.178548 | -1950.27439  |
| <b>TSB3-B4</b>      | -1950.19557  | -1950.16387  | -1950.162926 | -1950.25836  |
| <b>B4</b>           | -849.431438  | -849.411207  | -849.410262  | -849.47817   |
| <b>C1</b>           | -1936.258607 | -1936.227775 | -1936.226831 | -1936.320321 |

---

|                |              |              |              |              |
|----------------|--------------|--------------|--------------|--------------|
| <b>TSC1-C2</b> | -1936.252447 | -1936.222152 | -1936.221208 | -1936.313208 |
| <b>C2</b>      | -1707.243248 | -1707.217567 | -1707.216623 | -1707.299524 |
| <b>TSC2-C3</b> | -1950.166766 | -1950.13421  | -1950.133266 | -1950.230878 |
| <b>C3</b>      | -1950.21257  | -1950.179671 | -1950.178727 | -1950.277471 |
| <b>TSC3-C4</b> | -1950.206729 | -1950.175015 | -1950.174071 | -1950.268312 |
| <b>C4</b>      | -849.43548   | -849.415177  | -849.414233  | -849.482161  |

---

Table S2. Correction energies calculated at  $\omega$ B97X-D/BSII (6-311g\*\*, SDD) of Path A, path B, and path C. (unit: a.u.)

|              | $E+ZPE$ dichloroethane | $E$ dichloroethane | $H$ dichloroethane | $G$ dichloroethane |
|--------------|------------------------|--------------------|--------------------|--------------------|
| L            | -571.381674            | -571.37247         | -571.371526        | -571.416712        |
| CATA1        | -1317.761092           | -1317.748832       | -1317.747888       | -1317.802514       |
| I-Pd-OTf     | -1100.742527           | -1100.732891       | -1100.731947       | -1100.781815       |
| I-Pd-OTf-DCE | -2099.776322           | -2099.760012       | -2099.759068       | -2099.825158       |
| DCE          | -998.987035            | -998.982144        | -998.9812          | -999.015408        |
| OTf_ion      | -961.565394            | -961.558352        | -961.557408        | -961.597691        |
| HOAc         | -229.025839            | -229.022082        | -229.021138        | -229.051849        |
| Ph-I         | -242.953099            | -242.947301        | -242.946357        | -242.984749        |
| 1            | -618.491235            | -618.475793        | -618.474849        | -618.531674        |
| A1           | -1936.28799            | -1936.258434       | -1936.25749        | -1936.346886       |
| TSA1-A2      | -1936.2641             | -1936.234174       | -1936.23323        | -1936.325188       |
| A2           | -1707.280388           | -1707.255917       | -1707.254972       | -1707.33375        |
| TSA2-A3      | -1950.207184           | -1950.175351       | -1950.174407       | -1950.270309       |
| A3           | -1950.244742           | -1950.212864       | -1950.211919       | -1950.307307       |
| TSA3-A4      | -1950.235559           | -1950.203878       | -1950.202934       | -1950.299276       |
| A4           | -849.45149             | -849.431913        | -849.430968        | -849.497031        |
| B1           | -1936.289184           | -1936.258864       | -1936.25792        | -1936.351802       |
| TSB1-B2      | -1936.262836           | -1936.233989       | -1936.233045       | -1936.321424       |
| B2           | -1707.280954           | -1707.25641        | -1707.255466       | -1707.334386       |
| TSB2-B3      | -1950.224146           | -1950.192334       | -1950.19139        | -1950.28812        |
| B3           | -1950.244028           | -1950.211663       | -1950.210719       | -1950.307606       |
| TSB3-B4      | -1950.235421           | -1950.204292       | -1950.203348       | -1950.297479       |
| B4           | -849.451486            | -849.431916        | -849.430972        | -849.497006        |
| C1           | -1936.297079           | -1936.268643       | -1936.267699       | -1936.355258       |
| TSC1-C2      | -1936.289147           | -1936.260388       | -1936.259444       | -1936.347315       |

---

|                |              |              |              |              |
|----------------|--------------|--------------|--------------|--------------|
| <b>C2</b>      | -1707.27801  | -1707.25384  | -1707.252896 | -1707.332273 |
| <b>TSC2-C3</b> | -1950.213861 | -1950.1828   | -1950.181856 | -1950.275967 |
| <b>C3</b>      | -1950.249588 | -1950.216333 | -1950.215389 | -1950.31741  |
| <b>TSC3-C4</b> | -1950.238953 | -1950.207819 | -1950.206875 | -1950.299686 |
| <b>C4</b>      | -849.455136  | -849.434656  | -849.433712  | -849.502741  |

---

**Table S3. Energies calculated at  $\omega$ B97X-D/BSI (6-311g\*\*, SDD) level in gas phase of Path D, Path E, and path F. (unit: a.u.)**

|                | <i>E+ZPE</i> | <i>E</i>     | <i>H</i>     | <i>G</i>     |
|----------------|--------------|--------------|--------------|--------------|
| <b>D2</b>      | -1317.053342 | -1317.026364 | -1317.02542  | -1317.108664 |
| <b>TSD2-D3</b> | -1559.965366 | -1559.931491 | -1559.930547 | -1560.029557 |
| <b>D3</b>      | -1559.978912 | -1559.945402 | -1559.944458 | -1560.04111  |
| <b>TSD3-D4</b> | -1559.956809 | -1559.923366 | -1559.922422 | -1560.019468 |
| <b>A4</b>      | -849.431438  | -849.411207  | -849.410262  | -849.47817   |
| <b>L_PdI</b>   | -710.54217   | -710.529499  | -710.528555  | -710.584133  |
| <b>E2</b>      | -1317.053334 | -1317.02636  | -1317.025416 | -1317.10864  |
| <b>TSE2-E3</b> | -1559.963403 | -1559.929498 | -1559.928554 | -1560.027255 |
| <b>E3</b>      | -1559.974211 | -1559.940763 | -1559.939819 | -1560.036284 |
| <b>TSE3-E4</b> | -1559.940824 | -1559.907497 | -1559.906553 | -1560.003741 |
| <b>B4</b>      | -849.431438  | -849.411207  | -849.410262  | -849.47817   |
| <b>L_PdI</b>   | -710.54217   | -710.529499  | -710.528555  | -710.584133  |
| <b>F2</b>      | -1317.051256 | -1317.023981 | -1317.023036 | -1317.107648 |
| <b>TSF2-F3</b> | -1559.958092 | -1559.923288 | -1559.922344 | -1560.024573 |
| <b>F3</b>      | -1560.002596 | -1559.968343 | -1559.967399 | -1560.066365 |
| <b>TSF3-F4</b> | -1559.984246 | -1559.95017  | -1559.949225 | -1560.048265 |
| <b>C4</b>      | -849.43548   | -849.415177  | -849.414233  | -849.482161  |
| <b>L_PFI</b>   | -710.54217   | -710.529499  | -710.528555  | -710.584133  |

**Table S4.** Correction energies calculated at  $\omega$ B97X-D/BSII (6-311g\*\*, SDD) of Path D, Path E, and path F in DCE. (unit: a.u.)

|                | <i>E+ZPE</i> dichloroethane | <i>E</i> dichloroethane | <i>H</i> dichloroethane | <i>G</i> dichloroethane |
|----------------|-----------------------------|-------------------------|-------------------------|-------------------------|
| <b>D2</b>      | -1317.131293                | -1317.105123            | -1317.104178            | -1317.184527            |
| <b>TSD2-D3</b> | -1560.05162                 | -1560.018544            | -1560.0176              | -1560.114123            |
| <b>D3</b>      | -1560.077752                | -1560.044259            | -1560.043315            | -1560.140333            |
| <b>TSD3-D4</b> | -1560.055044                | -1560.022509            | -1560.021565            | -1560.116065            |
| <b>A4</b>      | -849.45149                  | -849.431913             | -849.430968             | -849.497031             |
| <b>L_PdI</b>   | -710.640283                 | -710.62853              | -710.627585             | -710.68027              |
| <b>E2</b>      | -1317.131284                | -1317.105121            | -1317.104177            | -1317.184468            |
| <b>TSE2-E3</b> | -1560.05233                 | -1560.019346            | -1560.018402            | -1560.114022            |
| <b>E3</b>      | -1560.074202                | -1560.040574            | -1560.03963             | -1560.137032            |
| <b>TSE3-E4</b> | -1560.042497                | -1560.010575            | -1560.009631            | -1560.103517            |
| <b>B4</b>      | -849.451486                 | -849.431916             | -849.430972             | -849.497006             |
| <b>L_PdI</b>   | -710.640283                 | -710.62853              | -710.627585             | -710.68027              |
| <b>F2</b>      | -1317.12797                 | -1317.10241             | -1317.101466            | -1317.182042            |
| <b>TSF2-F3</b> | -1560.040503                | -1560.008113            | -1560.007168            | -1560.102376            |
| <b>F3</b>      | -1560.089807                | -1560.055265            | -1560.054321            | -1560.154567            |
| <b>TSF3-F4</b> | -1560.072099                | -1560.038745            | -1560.037801            | -1560.135186            |
| <b>C4</b>      | -849.455136                 | -849.434656             | -849.433712             | -849.502741             |
| <b>L_PFI</b>   | -710.640283                 | -710.62853              | -710.627585             | -710.68027              |

Table S5. Correction energies calculated at  $\omega$ B97X-D/BSII (6-311g\*\*, SDD) of Path D, Path E, and path F in MeCN. (unit: a.u.)

|                | $E+ZPE_{\text{acetonitrile}}$ | $E_{\text{acetonitrile}}$ | $H_{\text{acetonitrile}}$ | $G_{\text{acetonitrile}}$ |
|----------------|-------------------------------|---------------------------|---------------------------|---------------------------|
| <b>D2</b>      | -1317.136308                  | -1317.110022              | -1317.109077              | -1317.191005              |
| <b>TSD2-D3</b> | -1560.057451                  | -1560.024346              | -1560.023402              | -1560.120161              |
| <b>D3</b>      | -1560.085549                  | -1560.052025              | -1560.051081              | -1560.147912              |
| <b>TSD3-D4</b> | -1560.062678                  | -1560.029162              | -1560.028218              | -1560.126738              |
| <b>A4</b>      | -849.453379                   | -849.433749               | -849.432805               | -849.499196               |
| <b>L_PdI</b>   | -710.647524                   | -710.634837               | -710.633892               | -710.690615               |
| <b>E2</b>      | -1317.136283                  | -1317.110018              | -1317.109074              | -1317.190433              |
| <b>TSE2-E3</b> | -1560.058568                  | -1560.025538              | -1560.024594              | -1560.12034               |
| <b>E3</b>      | -1560.081941                  | -1560.048271              | -1560.047327              | -1560.144994              |
| <b>TSE3-E4</b> | -1560.051043                  | -1560.019083              | -1560.018139              | -1560.11184               |
| <b>B4</b>      | -849.453379                   | -849.433749               | -849.432805               | -849.499196               |
| <b>L_PdI</b>   | -710.647524                   | -710.634837               | -710.633892               | -710.690615               |
| <b>F2</b>      | -1317.132996                  | -1317.10737               | -1317.10643               | -1317.18631               |
| <b>TSF2-F3</b> | -1560.045353                  | -1560.01284               | -1560.01189               | -1560.10778               |
| <b>F3</b>      | -1560.095417                  | -1560.06087               | -1560.05992               | -1560.16031               |
| <b>TSF3-F4</b> | -1560.078126                  | -1560.04383               | -1560.04289               | -1560.14355               |
| <b>C4</b>      | -849.456728                   | -849.436159               | -849.435215               | -849.504725               |
| <b>L_PFI</b>   | -710.647524                   | -710.634837               | -710.633892               | -710.690615               |



Figure S1. Reaction mechanism of B(4)-H/B(7)-H/B(8)-H activation in Path A/B/C.

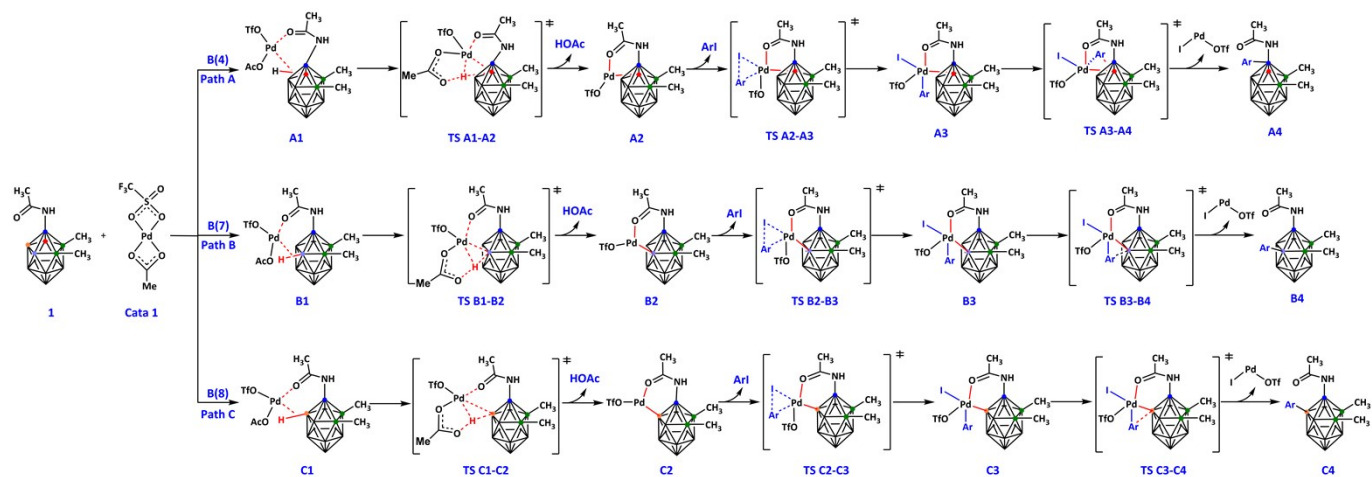

Description: The original picture is uploaded as an attachment.

Figure S2. Reaction mechanism of B(7)-H/B(8)-H activation in cation pathways (PathD/E/F) catalyzed by Pd<sup>II</sup> that 1, 10-o-phenanthroline as ligand.

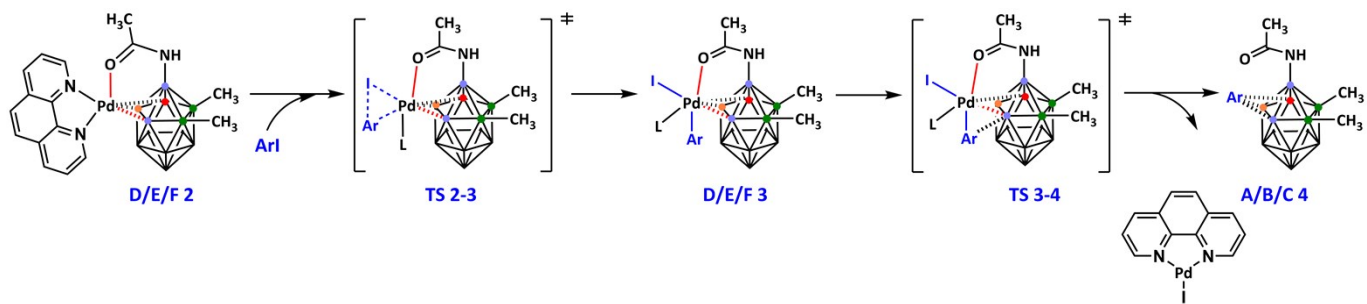

Figure S3. IRC profiles of all TSs in the pathways (a. IRC A1-A2, b. IRC A2-A3, c. IRC A3-A4, d. IRC B1-B2, e. IRC B2-B3, f. IRC B3-B4, g. IRC C1-C2, h. IRC C2-C3, i. IRC C3-C4).

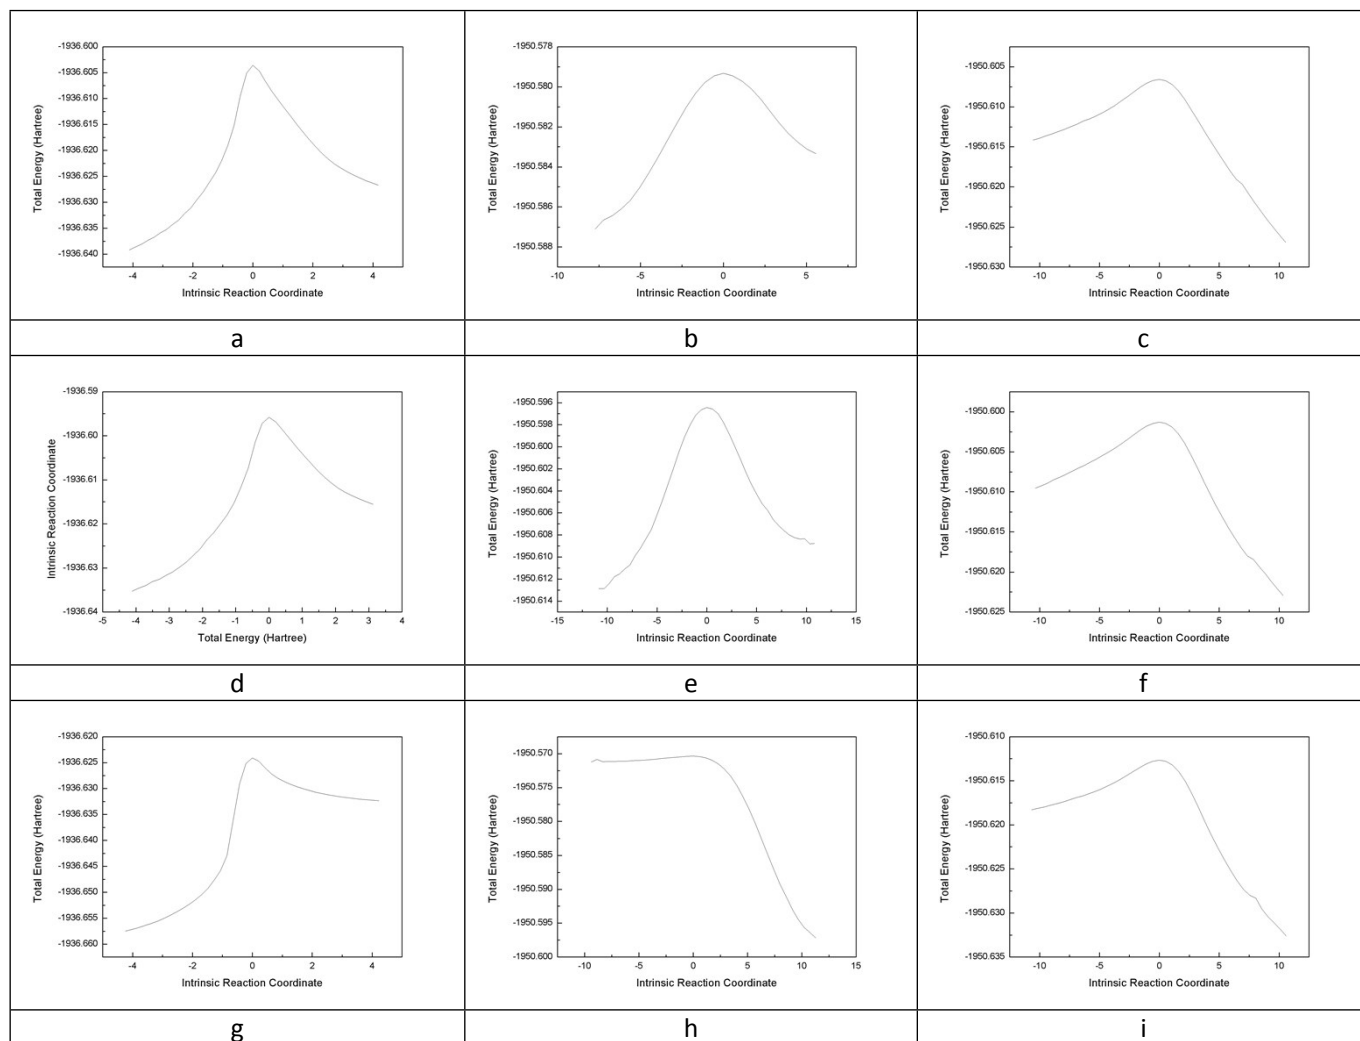

Cartesian coordinates of all stationary points optimized at  $\omega$ B97X-D/BSI (6-311g\*\*, SDD) level

|                 |             |             |             |              |             |             |             |
|-----------------|-------------|-------------|-------------|--------------|-------------|-------------|-------------|
| <b>HOAc</b>     |             |             |             | H            | -1.95823800 | -0.15821600 | -1.75809900 |
|                 |             |             |             | B            | -0.36488900 | -0.34374400 | -0.39417600 |
| O               | 0.63420100  | 1.19566500  | -0.00014300 | B            | 0.29967300  | -1.19027700 | 1.00554400  |
| C               | 0.09233700  | 0.12526400  | 0.00018200  | B            | 1.71454900  | -0.30065400 | 1.58957800  |
| O               | 0.78071900  | -1.03381700 | 0.00003400  | H            | 1.88486600  | -0.17146600 | 2.75336400  |
| C               | -1.38995700 | -0.11554400 | -0.00003200 | B            | 1.98531800  | 1.10711300  | 0.55693700  |
| H               | -1.66839400 | -0.69850000 | -0.88014000 | H            | 2.25659200  | 2.18223900  | 0.96374100  |
| H               | -1.66882200 | -0.69619800 | 0.88147300  | B            | 0.88207000  | -0.33089400 | -1.65381600 |
| H               | -1.91166000 | 0.83843100  | -0.00133400 | H            | 0.50757400  | -0.18481700 | -2.77025300 |
| H               | 1.71524400  | -0.79684400 | -0.00002200 | B            | 0.65205400  | -1.76619600 | -0.63550800 |
| <b>C6H5I</b>    |             |             |             | H            | 0.14244800  | -2.74513700 | -1.06891000 |
|                 |             |             |             | B            | 1.93226500  | -1.75637500 | 0.59539400  |
| C               | -2.64335300 | 1.20136600  | -0.00000300 | H            | 2.35605000  | -2.75524900 | 1.07191400  |
| C               | -1.25303500 | 1.20973300  | -0.00000100 | B            | 2.96282200  | -0.33208900 | 0.32150300  |
| C               | -0.57358200 | 0.00000500  | -0.00000100 | H            | 4.11686600  | -0.29869400 | 0.58735700  |
| C               | -1.25303300 | -1.20973300 | -0.00000200 | B            | 2.31253600  | 0.54109700  | -1.07902400 |
| C               | -2.64334400 | -1.20137100 | -0.00000300 | H            | 2.89178300  | 1.26395500  | -1.81585500 |
| C               | -3.33959400 | -0.00000100 | -0.00000400 | B            | 2.29296000  | -1.23221200 | -1.06315700 |
| H               | -3.17953400 | 2.14336700  | -0.00000300 | H            | 2.97636200  | -1.84714200 | -1.81124300 |
| H               | -0.71237500 | 2.14729600  | -0.00000100 | H            | -0.46460100 | -1.64396600 | 1.78026600  |
| H               | -0.71236200 | -2.14728900 | -0.00000100 | <b>Cata1</b> |             |             |             |
| H               | -3.17952900 | -2.14336900 | -0.00000300 | O            | 2.66374200  | 0.16952900  | -1.07651800 |
| H               | -4.42323000 | -0.00000800 | -0.00000600 | C            | 3.32369100  | 0.30848800  | 0.00080800  |
| I               | 1.55552200  | 0.00000000  | 0.00000200  | O            | 2.66325800  | 0.16935900  | 1.07755500  |
| <b>I-Pd-OTf</b> |             |             |             | C            | 4.78237500  | 0.58645500  | 0.00000200  |
| Pd              | 0.53011300  | -0.25843500 | -0.00059400 | H            | 5.07025800  | 1.07246400  | 0.93105900  |
| O               | -1.16605000 | -0.66937500 | -1.17661400 | H            | 5.31350000  | -0.36537800 | -0.08158100 |
| O               | -3.06788700 | -1.82723800 | 0.00106800  | H            | 5.04236000  | 1.20151100  | -0.86100200 |
| C               | -3.04731500 | 0.83874900  | -0.00012700 | Pd           | 0.97371500  | -0.21935000 | 0.00014700  |
| S               | -2.10677900 | -0.77459800 | 0.00034900  | O            | -0.72494600 | -0.64137800 | -1.18410100 |
| O               | -1.16619000 | -0.66772700 | 1.17739000  | O            | -2.60001700 | -1.83189800 | -0.00058800 |
| F               | -3.79910400 | 0.89322400  | 1.08153500  | C            | -2.62234400 | 0.82471300  | 0.00001200  |
| F               | -3.80124700 | 0.89111900  | -1.08035300 | S            | -1.64996900 | -0.76650900 | -0.00023300 |
| F               | -2.19088600 | 1.84648100  | -0.00186200 | O            | -0.72518500 | -0.64204800 | 1.18388300  |
| I               | 2.99866600  | 0.22427200  | 0.00026200  | F            | -3.37958300 | 0.86849900  | 1.08044800  |
| <b>1</b>        |             |             |             | F            | -3.37894500 | 0.86920300  | -1.08084700 |
|                 |             |             |             | F            | -1.78976700 | 1.85554300  | 0.00059100  |
| O               | -2.80280700 | -0.41224800 | 1.24409700  | <b>A1</b>    |             |             |             |
| C               | 0.38970300  | 0.52712700  | 0.90877200  | O            | -0.83412500 | 2.62482300  | 1.02484200  |
| C               | 0.74296500  | 1.01368300  | -0.61752000 | C            | -0.98369400 | 3.05162300  | -0.10255800 |
| C               | -0.47867400 | 1.42031300  | 1.76983700  | O            | -0.70501500 | 2.40356900  | -1.20400400 |
| H               | -0.94209300 | 0.81545700  | 2.54558800  | C            | -1.54639200 | 4.42583600  | -0.38551100 |
| H               | 0.12144700  | 2.20889200  | 2.22352300  | H            | -2.60979200 | 4.31531900  | -0.61175800 |
| H               | -1.28293800 | 1.86837700  | 1.18710000  | H            | -1.43344000 | 5.05280200  | 0.49730200  |
| C               | 0.14430100  | 2.31087700  | -1.11342100 | H            | -1.06238600 | 4.87885600  | -1.25038500 |
| H               | 0.57856700  | 2.54807200  | -2.08394200 | Pd           | -0.30513400 | 0.47923000  | -1.23417500 |
| H               | -0.93709500 | 2.21848400  | -1.22329800 | O            | -2.30491000 | 0.08573300  | -0.91747900 |
| H               | 0.36250300  | 3.12860800  | -0.42667500 | O            | -3.83423200 | -1.83652400 | -0.79492800 |
| C               | -2.87443400 | -0.32479800 | 0.03967700  | C            | -3.70476000 | -0.16854800 | 1.26721000  |
| C               | -4.19114600 | -0.40820200 | -0.70380800 | S            | -2.82823000 | -1.07464100 | -0.09873200 |
| H               | -4.26613500 | -1.37840600 | -1.20289700 | O            | -1.76462900 | -1.80878100 | 0.58367100  |
| H               | -5.00514200 | -0.31583700 | 0.01166800  | F            | -4.34377000 | -1.04457300 | 2.03533300  |
| H               | -4.27518000 | 0.37208700  | -1.46425800 | F            | -4.58168200 | 0.69062100  | 0.77011700  |
| N               | -1.76918000 | -0.14601400 | -0.76706700 | F            | -2.82485800 | 0.48967300  | 2.01142700  |
|                 |             |             |             | O            | -0.05984300 | -1.51355200 | -1.71801700 |

|   |             |             |             |           |             |             |             |
|---|-------------|-------------|-------------|-----------|-------------|-------------|-------------|
| C | 3.16247600  | -0.81685300 | 1.34995000  | H         | 2.47401600  | -2.11587400 | 2.58859800  |
| C | 1.91738500  | 0.21156800  | 1.00620500  | C         | 1.02966200  | 0.09045800  | 2.09762900  |
| C | 2.94774300  | -1.84617400 | 2.44144900  | H         | 0.39330600  | 0.97353500  | 2.03440400  |
| H | 3.68744500  | -2.63926100 | 2.33102400  | H         | 0.40536700  | -0.77948000 | 1.88522700  |
| H | 3.07599200  | -1.39162800 | 3.42281100  | H         | 1.44081100  | 0.01769600  | 3.10472600  |
| H | 1.94758700  | -2.27864700 | 2.39310800  | C         | 0.42234700  | -2.54432400 | -0.73013900 |
| C | 0.65308500  | 0.04670200  | 1.81719600  | C         | -0.18685700 | -3.90711200 | -0.68735800 |
| H | 0.02700200  | 0.92844400  | 1.66362700  | H         | 0.51806700  | -4.68108500 | -0.38233200 |
| H | 0.08934700  | -0.83664000 | 1.51224300  | H         | -1.01134200 | -3.84855500 | 0.03003800  |
| H | 0.89644500  | -0.02658700 | 2.87739700  | H         | -0.61242800 | -4.13706800 | -1.66237000 |
| C | 0.46255400  | -2.44775100 | -1.09149700 | N         | 1.50385300  | -2.28725500 | 0.02507600  |
| C | -0.10437900 | -3.82045500 | -1.25370900 | H         | 1.88121700  | -3.08014000 | 0.52079500  |
| H | 0.62425700  | -4.60693100 | -1.05432000 | B         | 2.32650800  | -1.06759300 | -0.08726000 |
| H | -0.93416300 | -3.89067000 | -0.54398400 | B         | 4.06597700  | -1.17759600 | -0.36362700 |
| H | -0.51108500 | -3.92221700 | -2.25798400 | B         | 4.87104000  | 0.00377800  | 0.67417400  |
| N | 1.50184000  | -2.27717100 | -0.25505200 | H         | 5.86927600  | -0.29175900 | 1.23578600  |
| H | 1.85227900  | -3.12734200 | 0.15971200  | B         | 3.63967000  | 0.88324700  | 1.59478200  |
| B | 2.34258900  | -1.07145700 | -0.14230700 | H         | 3.73917000  | 1.14203900  | 2.74155200  |
| B | 4.09924300  | -1.19880700 | -0.03421900 | B         | 1.79021200  | 0.54586400  | -0.58205200 |
| B | 4.67383600  | -0.04749200 | 1.17613600  | H         | 0.74227000  | 1.60030400  | -0.87570400 |
| H | 5.52393600  | -0.37206800 | 1.93141200  | B         | 3.03932000  | -0.31336000 | -1.51910100 |
| B | 3.28593400  | 0.83914000  | 1.83086000  | H         | 2.78967500  | -0.77359200 | -2.58047300 |
| H | 3.14235600  | 1.07013900  | 2.97804900  | B         | 4.62774500  | 0.35005500  | -1.04899500 |
| B | 1.95589200  | 0.56522800  | -0.67814000 | H         | 5.54024300  | 0.37288800  | -1.80292700 |
| H | 1.20285500  | 0.96819500  | -1.64993800 | B         | 4.35695600  | 1.62458200  | 0.16530300  |
| B | 3.35479100  | -0.29555400 | -1.35947100 | H         | 5.06147800  | 2.56735700  | 0.28832600  |
| H | 3.31528000  | -0.71768700 | -2.46498100 | B         | 2.61400600  | 1.74609500  | 0.45464000  |
| B | 4.80932000  | 0.33792700  | -0.54986100 | H         | 2.02561900  | 2.69143200  | 0.84301300  |
| H | 5.86055600  | 0.36401500  | -1.09338600 | B         | 3.21687800  | 1.42154800  | -1.19186800 |
| B | 4.29898700  | 1.59237200  | 0.60833200  | H         | 3.08948100  | 2.23829800  | -2.03974800 |
| H | 4.97486900  | 2.51864200  | 0.90011900  | H         | 4.50648400  | -2.26972400 | -0.48730700 |
| B | 2.52914000  | 1.73881300  | 0.52105900  |           |             |             |             |
| H | 1.85988100  | 2.67414200  | 0.77744100  | <b>A2</b> |             |             |             |
| B | 3.47374400  | 1.43602100  | -0.95877500 |           |             |             |             |
| H | 3.53050000  | 2.26234200  | -1.80410200 | Pd        | -0.59049100 | 0.72310800  | -0.11730200 |
| H | 4.54858500  | -2.29362800 | -0.08134000 | O         | 0.52868600  | 2.41898700  | 0.29409600  |

**TS A1-A2**

|    |             |             |             |   |            |             |             |
|----|-------------|-------------|-------------|---|------------|-------------|-------------|
| O  | -0.63913000 | 2.63471700  | 1.17003700  | C | 3.68176800 | -0.69079600 | -0.29162800 |
| C  | -0.78289400 | 3.04793700  | 0.04899200  | C | 2.20323900 | -0.53046600 | -0.99500400 |
| O  | -0.37947900 | 2.40097400  | -1.05403200 | C | 4.86395800 | -0.00505300 | -0.94384700 |
| C  | -1.43677200 | 4.35558700  | -0.30507300 | H | 5.69921000 | 0.00459300  | -0.24380900 |
| H  | -2.36555700 | 4.14808400  | -0.84080100 | H | 5.17275700 | -0.54018300 | -1.84111600 |
| H  | -1.64992800 | 4.91200800  | 0.60502900  | H | 4.62610700 | 1.02364800  | -1.22082100 |
| H  | -0.79153800 | 4.93223000  | -0.96912800 | C | 2.10201700 | 0.29420500  | -2.25982300 |
| Pd | -0.31092500 | 0.33368500  | -1.05600700 | H | 1.10670400 | 0.15968300  | -2.68151800 |
| O  | -2.39489800 | -0.08395100 | -1.10412100 | H | 2.24589700 | 1.35562000  | -2.05463800 |
| O  | -3.75388500 | -2.09304500 | -0.64241600 | H | 2.83910500 | -0.03004900 | -2.99478900 |
| C  | -4.02025800 | 0.02664200  | 0.92806800  | C | 1.71703900 | 2.68631600  | 0.49951000  |
| S  | -2.90835700 | -1.06575300 | -0.08229700 | C | 2.08636300 | 4.11531800  | 0.78131600  |
| O  | -1.86659800 | -1.48772200 | 0.85582700  | H | 3.13762700 | 4.32499000  | 0.58046400  |
| F  | -4.53543800 | -0.66469300 | 1.93865600  | H | 1.45396900 | 4.76915400  | 0.18331700  |
| F  | -5.01036900 | 0.50187100  | 0.18334300  | H | 1.88120000 | 4.31871100  | 1.83550100  |
| F  | -3.32764400 | 1.05038300  | 1.42060100  | N | 2.70568300 | 1.77001900  | 0.50340400  |
| O  | -0.10651600 | -1.67856700 | -1.44193400 | H | 3.61498300 | 2.12390800  | 0.75934300  |
| C  | 3.44277800  | -0.77789200 | 1.18563500  | B | 2.50984100 | 0.30378700  | 0.50183300  |
| C  | 2.13779200  | 0.23391200  | 1.07839100  | B | 3.54602300 | -0.78625800 | 1.41443300  |
| C  | 3.47733500  | -1.78080100 | 2.32123800  | B | 3.84620300 | -2.22356200 | 0.42968900  |
| H  | 4.07341500  | -2.64341600 | 2.02133800  | H | 4.92636500 | -2.70656400 | 0.41362200  |
| H  | 3.93496100  | -1.33868300 | 3.20497100  | B | 2.99146200 | -2.05138100 | -1.10932500 |
|    |             |             |             | H | 3.46227500 | -2.32524600 | -2.15703600 |
|    |             |             |             | B | 0.96457400 | -0.48022200 | 0.20337700  |
|    |             |             |             | B | 1.80865600 | -0.69455100 | 1.76153100  |

|   |             |             |             |   |             |             |             |
|---|-------------|-------------|-------------|---|-------------|-------------|-------------|
| H | 1.41305600  | -0.16232100 | 2.74387600  | B | 0.41613800  | -2.62812800 | 0.53791400  |
| B | 2.62983900  | -2.27076000 | 1.72595000  | H | -0.60970900 | -2.95956400 | 0.05898000  |
| H | 2.82233300  | -2.89550100 | 2.71373200  | B | 0.71564700  | -1.87991200 | 2.12835300  |
| B | 2.28842100  | -3.04124900 | 0.15799900  | H | -0.16935700 | -1.71714800 | 2.89535100  |
| H | 2.22867000  | -4.21389900 | 0.00751800  | H | 4.60296900  | -1.22508200 | 1.59167300  |
| B | 1.26006800  | -1.93295800 | -0.77787600 | C | -1.30234200 | 3.77588900  | 2.23034900  |
| H | 0.50678400  | -2.20706600 | -1.64506200 | C | -1.39522000 | 2.94434900  | 1.12153100  |
| B | 1.02442400  | -2.08401700 | 0.97572800  | C | -0.23576600 | 2.30672700  | 0.68552800  |
| H | 0.04118800  | -2.57584100 | 1.41213300  | C | 1.00459700  | 2.53399900  | 1.26515500  |
| O | -1.86558100 | -0.85605700 | -0.65738900 | C | 1.06722700  | 3.36837800  | 2.37409300  |
| O | -2.89192500 | 1.32781100  | -0.69540000 | C | -0.07927500 | 3.98556700  | 2.85661800  |
| C | -4.09540600 | -0.56383600 | 0.71954000  | H | -2.19929300 | 4.25819400  | 2.59991300  |
| S | -3.17176700 | -0.11227900 | -0.83079400 | H | -2.34585200 | 2.77415400  | 0.63365000  |
| O | -3.98700700 | -0.56611900 | -1.92328900 | H | 1.89931300  | 2.06446300  | 0.88478400  |
| F | -5.26207800 | 0.06566100  | 0.74762500  | H | 2.02420800  | 3.52943800  | 2.85609100  |
| F | -3.38938700 | -0.20685900 | 1.79021300  | H | -0.01952600 | 4.63837300  | 3.71921700  |
| F | -4.30514100 | -1.87130300 | 0.76181100  | I | -0.12798000 | 1.85390000  | -1.72586500 |
| H | 4.42749100  | -0.29301600 | 2.03598500  |   |             |             |             |

## A3

## TS A2-A3

|    |             |             |             |    |             |             |             |
|----|-------------|-------------|-------------|----|-------------|-------------|-------------|
| Pd | -0.83263200 | 0.28027800  | 0.29361000  | Pd | 0.26807200  | 0.49838100  | 0.21556000  |
| O  | -2.18202500 | -1.25632800 | 1.06562700  | O  | 0.01495900  | -0.33536500 | 2.19029400  |
| O  | -4.61839200 | -0.93284700 | 1.46848100  | C  | -3.29510300 | -2.23595300 | -0.20156700 |
| C  | -3.82262700 | -1.68871900 | -0.94202100 | C  | -2.01181100 | -1.49994000 | -0.98060800 |
| S  | -3.49859200 | -0.69899900 | 0.60072200  | C  | -3.26955100 | -3.74264700 | -0.04152200 |
| O  | -3.26549200 | 0.67188300  | 0.10388500  | H  | -3.79111700 | -4.01522400 | 0.87678200  |
| F  | -4.92478800 | -1.26214400 | -1.53789100 | H  | -3.77587800 | -4.22222000 | -0.87797000 |
| F  | -3.95147100 | -2.97319500 | -0.64639400 | H  | -2.24870800 | -4.12540700 | 0.00283400  |
| F  | -2.79746100 | -1.55070200 | -1.79141600 | C  | -0.90984900 | -2.39170600 | -1.50546000 |
| O  | 5.26019700  | 0.33277500  | -0.38243400 | H  | -0.23457100 | -1.78629500 | -2.10932200 |
| C  | 3.08334200  | -2.29005900 | -0.07009400 | H  | -0.31745600 | -2.81480500 | -0.69647500 |
| C  | 1.54813800  | -1.92239800 | -0.52031900 | H  | -1.32762400 | -3.18134200 | -2.12956000 |
| C  | 4.12539300  | -2.46993100 | -1.15347900 | C  | -0.39094900 | -1.47929200 | 2.43653900  |
| H  | 3.99442900  | -1.73621800 | -1.94877500 | C  | 0.21592600  | -2.23508300 | 3.57488200  |
| H  | 5.11083500  | -2.31109900 | -0.72064100 | H  | -0.32457300 | -3.14969100 | 3.82008100  |
| H  | 4.06494200  | -3.47187700 | -1.57756100 | H  | 1.24629300  | -2.46981500 | 3.28891800  |
| C  | 1.24604500  | -1.80157300 | -1.99764600 | H  | 0.25449300  | -1.57971800 | 4.44514700  |
| H  | 0.17528700  | -1.65090100 | -2.12985800 | N  | -1.34734900 | -2.06826100 | 1.69411000  |
| H  | 1.77378300  | -0.95710900 | -2.44101200 | H  | -1.63183700 | -2.98499100 | 2.00155400  |
| H  | 1.53585400  | -2.71290600 | -2.51978700 | B  | -2.20833300 | -1.32625600 | 0.75502200  |
| C  | 4.28162900  | 0.89628900  | -0.81242600 | B  | -3.95087900 | -1.22960100 | 1.02045400  |
| C  | 4.35585900  | 2.17775700  | -1.61651000 | B  | -4.75545700 | -1.42253000 | -0.53493500 |
| H  | 3.84320700  | 2.06463400  | -2.57563300 | H  | -5.72736300 | -2.09178300 | -0.61957300 |
| H  | 3.86921700  | 2.99309000  | -1.07369100 | B  | -3.52154500 | -1.61147000 | -1.78883200 |
| H  | 5.40004500  | 2.42872900  | -1.78746300 | H  | -3.58856700 | -2.39912900 | -2.66521200 |
| N  | 2.99279800  | 0.43545600  | -0.62059200 | B  | -1.71550700 | 0.04473100  | -0.27188100 |
| H  | 2.27785000  | 0.98592400  | -1.07490100 | B  | -2.97409900 | 0.24996600  | 0.97924100  |
| B  | 2.53672700  | -0.65750300 | 0.23380100  | B  | -4.56336400 | 0.19092900  | 0.17531800  |
| B  | 3.48437000  | -1.55344400 | 1.42863100  | H  | -5.49262200 | 0.78994800  | 0.59916200  |
| B  | 3.08704800  | -3.27404700 | 1.31602800  | B  | -4.29961100 | -0.05281800 | -1.56581900 |
| H  | 3.95408400  | -4.07419600 | 1.39906700  | H  | -5.02734500 | 0.36580400  | -2.39998800 |
| B  | 1.86540600  | -3.50902400 | 0.06917500  | B  | -2.54929800 | -0.14051400 | -1.84774700 |
| H  | 1.88399300  | -4.37262900 | -0.73516200 | H  | -2.00637200 | 0.09415200  | -2.86533000 |
| B  | 0.82009500  | -0.90312800 | 0.65396900  | B  | -3.18966100 | 0.97887700  | -0.63087400 |
| B  | 2.02486600  | -0.68099800 | 1.93306500  | H  | -3.17087600 | 2.14391700  | -0.80903300 |
| H  | 2.09061700  | 0.31723000  | 2.56377200  | C  | -0.16471600 | 2.33112100  | 0.88628800  |
| B  | 2.37458900  | -2.28689100 | 2.60534600  | C  | -0.93017400 | 3.31590300  | 0.28820500  |
| H  | 2.70610800  | -2.42255100 | 3.73422700  | C  | 0.49840500  | 2.54264000  | 2.08650100  |
| B  | 1.37774400  | -3.49032500 | 1.75399400  | C  | -1.07955200 | 4.53343300  | 0.94453800  |
| H  | 0.98292600  | -4.48680400 | 2.25595000  | H  | -1.39428100 | 3.16182600  | -0.67264100 |
|    |             |             |             | C  | 0.34144300  | 3.77011300  | 2.72458100  |

|   |             |             |             |   |             |             |             |
|---|-------------|-------------|-------------|---|-------------|-------------|-------------|
| H | 1.13237900  | 1.78145100  | 2.52352200  | C | -2.78112900 | 3.77969600  | 2.22579700  |
| C | -0.45259600 | 4.76010500  | 2.16227400  | H | -2.97405100 | 4.64092600  | 0.26469400  |
| H | -1.68144500 | 5.30900700  | 0.48468400  | H | -2.43650300 | 2.67333000  | 4.03772700  |
| H | 0.85102100  | 3.94271700  | 3.66568900  | H | -3.31246200 | 4.58431400  | 2.72127500  |
| H | -0.57043400 | 5.71315600  | 2.66480700  | I | 0.84773600  | 2.08474300  | -1.59280300 |
| I | 0.76409900  | 1.42755900  | -2.13535100 | O | 1.88565400  | -0.62243600 | -0.04516500 |
| O | 1.41176600  | -1.54558500 | -0.02330900 | O | 3.26417700  | 0.36230900  | 1.75106700  |
| O | 2.64081900  | 0.30215600  | 0.93568500  | C | 4.44738000  | -0.56059600 | -0.44501900 |
| C | 3.99411400  | -1.42465500 | -0.57310000 | S | 3.11137300  | -0.74466700 | 0.83357800  |
| S | 2.66356100  | -1.15031300 | 0.69453000  | O | 3.25649600  | -2.09833600 | 1.34262500  |
| O | 3.01530100  | -2.00783700 | 1.80749100  | F | 5.63436200  | -0.72222200 | 0.12771400  |
| F | 5.16737500  | -1.05726300 | -0.07697600 | F | 4.39632300  | 0.64150500  | -0.99844200 |
| F | 3.74689100  | -0.72253100 | -1.66821200 | F | 4.30121600  | -1.47963900 | -1.39540000 |
| F | 4.04325500  | -2.71432900 | -0.89206800 | H | -3.61488400 | -3.48093700 | 1.00464500  |
| H | -4.35786300 | -1.77690200 | 1.98835200  | H | -3.16315300 | -0.67287400 | 2.15196000  |
| H | -2.74455800 | 0.86142500  | 1.96511800  |   |             |             |             |

## A4

## TS A3-A4

|    |             |             |             |   |             |             |             |
|----|-------------|-------------|-------------|---|-------------|-------------|-------------|
| Pd | 0.16261400  | 0.53698700  | 0.39070400  | O | 1.50472200  | 1.96641700  | 1.01296500  |
| O  | 0.07367900  | -0.73015700 | 2.10689000  | C | -2.32005100 | 0.56092100  | 0.35483800  |
| C  | -2.51260500 | -2.64766800 | -1.04361200 | C | -1.00544600 | -0.22760400 | 0.97280000  |
| C  | -1.62043900 | -1.28602500 | -1.33118900 | C | -2.79887600 | 1.80952300  | 1.05887100  |
| C  | -1.91528900 | -3.98591500 | -1.43027300 | H | -3.73060100 | 2.13477100  | 0.59721200  |
| H  | -2.43592700 | -4.77499600 | -0.88737400 | H | -2.98311800 | 1.61839900  | 2.11580100  |
| H  | -2.04051000 | -4.16478400 | -2.49750800 | H | -2.06270400 | 2.60898500  | 0.96186500  |
| H  | -0.85076300 | -4.03712900 | -1.19791800 | C | -0.41528500 | 0.24438200  | 2.28638900  |
| C  | -0.29317300 | -1.51019700 | -2.02512700 | H | -0.87801500 | -0.29447100 | 3.11284300  |
| H  | 0.03225400  | -0.57781700 | -2.48181100 | H | 0.65753500  | 0.06856500  | 2.27923300  |
| H  | 0.48267600  | -1.82656700 | -1.32813900 | H | -0.55407900 | 1.31462300  | 2.42491800  |
| H  | -0.40571600 | -2.25303600 | -2.81438600 | C | 1.02322900  | 2.46545900  | 0.02318100  |
| C  | -0.03882800 | -1.96469600 | 2.03162100  | C | 1.63757900  | 3.67623000  | -0.64797600 |
| C  | 0.66905200  | -2.82830500 | 3.02222900  | H | 2.18173100  | 3.34911700  | -1.53872200 |
| H  | 0.19357600  | -3.80187900 | 3.14531000  | H | 0.88297000  | 4.40328600  | -0.95767600 |
| H  | 1.69442900  | -2.95089800 | 2.65484300  | H | 2.33928900  | 4.14171000  | 0.04043300  |
| H  | 0.71764900  | -2.30464700 | 3.97541900  | N | -0.10800200 | 1.98125700  | -0.60012500 |
| N  | -0.76577400 | -2.54463200 | 1.05819000  | H | -0.37943600 | 2.49441200  | -1.42544200 |
| H  | -0.81719500 | -3.55073100 | 1.10970800  | B | -0.76903600 | 0.67557700  | -0.48220800 |
| B  | -1.82839900 | -1.83524400 | 0.31497600  | B | -2.31625100 | 0.47684400  | -1.33811400 |
| B  | -3.46702000 | -2.49767400 | 0.36090500  | B | -3.41904900 | -0.51920900 | -0.37781100 |
| B  | -4.17775900 | -2.35664700 | -1.24952200 | H | -4.56559800 | -0.23386200 | -0.31115300 |
| H  | -4.81723400 | -3.24743400 | -1.69282000 | B | -2.58223600 | -0.94567600 | 1.10952800  |
| B  | -2.99310000 | -1.58098200 | -2.31137700 | H | -3.07123200 | -0.93283100 | 2.18440800  |
| H  | -2.77675100 | -1.92853700 | -3.41773900 | B | -0.03891100 | -0.93977800 | -0.29646200 |
| B  | -1.91783900 | -0.07193400 | -0.05650700 | B | -0.91467000 | -0.50898500 | -1.78448300 |
| B  | -3.14334400 | -0.87513000 | 0.98711500  | H | -0.32618800 | -0.30322400 | -2.79394000 |
| B  | -4.60539300 | -1.19901400 | 0.01649300  | B | -2.53146000 | -1.23918600 | -1.73245200 |
| H  | -5.68034700 | -1.18848200 | 0.51258100  | H | -3.09809500 | -1.56725300 | -2.72042800 |
| B  | -4.30098300 | -0.62965200 | -1.63836400 | B | -2.68549900 | -2.12092900 | -0.19188700 |
| H  | -5.14541700 | -0.21287600 | -2.35523100 | H | -3.34542900 | -3.09339200 | -0.04308200 |
| B  | -2.64695700 | 0.03602700  | -1.68524400 | B | -1.15848200 | -1.90211200 | 0.69125000  |
| H  | -2.23806200 | 0.83833700  | -2.44916800 | H | -0.72737900 | -2.62327500 | 1.52463200  |
| B  | -3.67034800 | 0.28050800  | -0.25329800 | B | -1.13790300 | -2.11630500 | -1.06600700 |
| H  | -4.10497400 | 1.34134900  | 0.02355600  | H | -0.68277800 | -3.09424400 | -1.55635300 |
| C  | -1.41193100 | 1.70579500  | 0.94723200  | H | -2.72121100 | 1.42711400  | -1.92140800 |
| C  | -1.91506900 | 2.78660500  | 0.21296300  | C | 3.52656700  | -1.82055600 | 0.97599800  |
| C  | -1.60802600 | 1.68087900  | 2.33475500  | C | 2.14309600  | -1.74430900 | 0.87808900  |
| C  | -2.58979700 | 3.81436800  | 0.85064600  | C | 1.52652700  | -1.04672900 | -0.16362800 |
| H  | -1.80918900 | 2.81339300  | -0.86106300 | C | 2.35109700  | -0.44274200 | -1.11782500 |
| C  | -2.29172000 | 2.70956100  | 2.96433200  | C | 3.73393900  | -0.51933500 | -1.03020900 |
| H  | -1.23123800 | 0.85615100  | 2.92287000  | C | 4.32682900  | -1.20540700 | 0.02239500  |
|    |             |             |             | H | 3.98047300  | -2.36415700 | 1.79722500  |

|           |             |             |             |                 |             |             |             |
|-----------|-------------|-------------|-------------|-----------------|-------------|-------------|-------------|
| H         | 1.53472200  | -2.24239100 | 1.62568400  |                 |             |             |             |
| H         | 1.90143300  | 0.09571100  | -1.94616300 |                 |             |             |             |
| H         | 4.35128200  | -0.04286700 | -1.78400900 |                 |             |             |             |
| H         | 5.40692300  | -1.26504200 | 0.09696300  |                 |             |             |             |
| <b>B1</b> |             |             |             | <b>TS B1-B2</b> |             |             |             |
| O         | -1.09628900 | 2.42524500  | 0.98313900  | O               | -0.79421300 | 2.51905000  | 1.21524500  |
| C         | -1.14754500 | 2.90706200  | -0.12503700 | C               | -0.92162200 | 2.93904300  | 0.09769300  |
| O         | -0.78620700 | 2.28866400  | -1.23055500 | O               | -0.52471200 | 2.26761200  | -1.00154300 |
| C         | -1.66480300 | 4.30021100  | -0.40379500 | C               | -1.54503100 | 4.25723400  | -0.27223900 |
| H         | -2.73020800 | 4.22435400  | -0.63509700 | H               | -2.48201100 | 4.06448200  | -0.79918600 |
| H         | -1.54173800 | 4.91243800  | 0.48835800  | H               | -1.74142600 | 4.82834900  | 0.63257000  |
| H         | -1.16062500 | 4.75077600  | -1.25820300 | H               | -0.89029900 | 4.81213600  | -0.94533900 |
| Pd        | -0.34285300 | 0.38404600  | -1.08308100 | Pd              | -0.33500300 | 0.22919300  | -0.72740800 |
| O         | -2.35303000 | -0.05206600 | -0.93998800 | O               | -2.34158800 | -0.28106200 | -1.06863900 |
| O         | -3.45504300 | -2.23154000 | -0.57718000 | O               | -3.88940200 | -2.16779000 | -0.75315200 |
| C         | -4.18882300 | -0.16438800 | 0.91086200  | C               | -4.34389500 | 0.09714100  | 0.54353100  |
| S         | -2.82487300 | -1.09391400 | 0.05550400  | S               | -3.11505300 | -1.14058300 | -0.09786700 |
| O         | -1.82523300 | -1.36878800 | 1.08143900  | O               | -2.32533100 | -1.51585300 | 1.06951500  |
| F         | -4.72425600 | -0.94800000 | 1.84195500  | F               | -5.09156300 | -0.45544200 | 1.49195100  |
| F         | -5.12953500 | 0.16869400  | 0.03634500  | F               | -5.13566200 | 0.51743000  | -0.43644000 |
| F         | -3.72096200 | 0.93010500  | 1.48396200  | F               | -3.71024000 | 1.14865400  | 1.05708800  |
| O         | 0.03369400  | -1.67128300 | -1.23924000 | O               | -0.00900900 | -1.82001000 | -0.68832100 |
| C         | 3.15618600  | -0.29967100 | -0.70561500 | C               | 2.92836800  | -0.28600800 | -0.87414900 |
| C         | 3.82110600  | -0.83372600 | 0.68597700  | C               | 3.97918700  | -0.82834000 | 0.25781900  |
| C         | 3.17890500  | -1.20224900 | -1.92118000 | C               | 2.64897600  | -1.17288800 | -2.07080200 |
| H         | 2.42086000  | -0.87281400 | -2.63060800 | H               | 1.78238400  | -0.78853500 | -2.60604100 |
| H         | 4.15450000  | -1.16465800 | -2.40396600 | H               | 3.50603500  | -1.17712400 | -2.74354000 |
| H         | 2.95619200  | -2.23511400 | -1.65231200 | H               | 2.42931600  | -2.19634900 | -1.76984300 |
| C         | 4.44066500  | -2.21500000 | 0.70325200  | C               | 4.58339000  | -2.20299500 | 0.06844000  |
| H         | 4.88330400  | -2.38715900 | 1.68348300  | H               | 5.32017600  | -2.37261000 | 0.85274000  |
| H         | 3.69599300  | -2.98882300 | 0.51495700  | H               | 3.82177300  | -2.98107500 | 0.12894800  |
| H         | 5.22487000  | -2.29685100 | -0.04894200 | H               | 5.08297500  | -2.27875500 | -0.89697300 |
| C         | 0.41386900  | -2.40453800 | -0.31048400 | C               | 0.49703500  | -2.46910900 | 0.23975600  |
| C         | -0.16262700 | -3.77691100 | -0.18704900 | C               | -0.11878700 | -3.77260000 | 0.62275700  |
| H         | 0.45926800  | -4.44552500 | 0.40880100  | H               | 0.52471600  | -4.38864200 | 1.25106000  |
| H         | -1.14221000 | -3.66260800 | 0.28513600  | H               | -1.04436800 | -3.51880900 | 1.15037600  |
| H         | -0.32104700 | -4.18623900 | -1.18376800 | H               | -0.40094100 | -4.30970600 | -0.28231900 |
| N         | 1.34458100  | -2.01244800 | 0.57868200  | N               | 1.58032100  | -2.03024900 | 0.90726100  |
| H         | 1.45730700  | -2.61917600 | 1.37737000  | H               | 1.86145500  | -2.58488700 | 1.70195200  |
| B         | 2.06516400  | -0.72854200 | 0.60919100  | B               | 2.27821500  | -0.74819900 | 0.70083000  |
| B         | 1.81055800  | 0.71718600  | -0.37346000 | B               | 1.70563900  | 0.68492100  | -0.13636200 |
| B         | 3.37148300  | 1.39057600  | -0.86481500 | B               | 3.05997400  | 1.39792400  | -1.05214900 |
| H         | 3.49956000  | 1.80430600  | -1.96499500 | H               | 2.85305100  | 1.84089900  | -2.12892100 |
| B         | 4.65558500  | 0.38816400  | -0.18847700 | B               | 4.50742000  | 0.41926600  | -0.79771200 |
| H         | 5.61662300  | 0.05254300  | -0.78572400 | H               | 5.25996800  | 0.11224400  | -1.65301800 |
| B         | 2.95912600  | -0.23700000 | 2.04012000  | B               | 3.55260400  | -0.26759800 | 1.81791800  |
| H         | 2.88449500  | -0.95977200 | 2.97590200  | H               | 3.76782700  | -1.00811800 | 2.71818000  |
| B         | 1.66802300  | 0.80371700  | 1.39885700  | B               | 2.11910500  | 0.75663800  | 1.59921900  |
| H         | 0.62573200  | 0.89284300  | 1.93929500  | H               | 1.26824200  | 0.82379500  | 2.41526700  |
| B         | 2.46364200  | 2.11774300  | 0.48609500  | B               | 2.58790000  | 2.09035500  | 0.52274900  |
| H         | 1.95772100  | 3.17760600  | 0.35276600  | H               | 2.06173000  | 3.14844400  | 0.57476600  |
| B         | 4.22912100  | 1.90114900  | 0.60242200  | B               | 4.30644000  | 1.91030600  | 0.10709800  |
| H         | 5.00101400  | 2.79765800  | 0.57858200  | H               | 5.01809400  | 2.82637700  | -0.12703100 |
| B         | 4.52623800  | 0.44237300  | 1.56872100  | B               | 4.90031200  | 0.44722200  | 0.91938600  |
| H         | 5.48773200  | 0.17534300  | 2.20335200  | H               | 6.01153600  | 0.19133300  | 1.23301400  |
| B         | 3.18483000  | 1.52386100  | 1.99539400  | B               | 3.73158300  | 1.49490300  | 1.74368600  |
| H         | 3.21484600  | 2.15166400  | 2.99766800  | H               | 4.04577100  | 2.11529800  | 2.70130600  |
| H         | 1.19214000  | 0.86292300  | -1.49226300 | H               | 0.65226900  | 1.55052700  | -0.73056100 |
|           |             |             |             | <b>B2</b>       |             |             |             |
|           |             |             |             | Pd              | -0.60160900 | 0.87653800  | -0.55655000 |
|           |             |             |             | O               | 0.56827500  | 2.51514600  | -0.06391400 |
|           |             |             |             | C               | 1.69934700  | -0.76161000 | 0.88966300  |



|   |             |             |             |   |             |             |             |
|---|-------------|-------------|-------------|---|-------------|-------------|-------------|
| C | 3.33288900  | -0.88136000 | 0.72914400  | H | 0.01218100  | -2.31262000 | 4.04032900  |
| C | 1.14459600  | -0.24098800 | 2.19826900  | N | -1.56809100 | -2.36482200 | 1.21876400  |
| H | 0.06591800  | -0.39082000 | 2.19907200  | H | -1.70143800 | -3.36454600 | 1.22383700  |
| H | 1.57363700  | -0.77985300 | 3.04336900  | B | -2.14967300 | -1.61198600 | 0.09645300  |
| H | 1.34087300  | 0.82485100  | 2.31975300  | B | -1.55330100 | -0.09949500 | -0.62488900 |
| C | 4.19939300  | -0.45784000 | 1.89650300  | B | -2.96139200 | 0.90273800  | -1.01935000 |
| H | 5.22275600  | -0.31730400 | 1.54873800  | H | -2.95089200 | 2.06929100  | -0.84193600 |
| H | 3.84517600  | 0.47645500  | 2.33561500  | B | -4.43879200 | 0.05153200  | -0.55811900 |
| H | 4.20118300  | -1.22365400 | 2.67121900  | H | -5.35112800 | 0.56463300  | -0.01194800 |
| C | 1.75711000  | 2.72817600  | 0.19690400  | B | -3.14482400 | -2.44311900 | -1.09679200 |
| C | 2.18885400  | 4.14680100  | 0.43939700  | H | -3.27571000 | -3.61239900 | -0.95258900 |
| H | 3.12155100  | 4.21367800  | 1.00062200  | B | -1.66537200 | -1.59305100 | -1.59954800 |
| H | 2.32508200  | 4.63189000  | -0.53057000 | H | -0.69222300 | -2.18705700 | -1.91001900 |
| H | 1.39581100  | 4.67275900  | 0.96831400  | B | -2.16706900 | -0.03408200 | -2.29992600 |
| N | 2.69743100  | 1.76569600  | 0.26425100  | H | -1.54656700 | 0.49848800  | -3.15248600 |
| H | 3.63831700  | 2.09606300  | 0.41627100  | B | -3.94153800 | 0.06306600  | -2.24198600 |
| B | 2.51831900  | 0.35930000  | -0.15869300 | H | -4.58501500 | 0.66982700  | -3.02904800 |
| B | 0.97277400  | -0.34178200 | -0.61796800 | B | -4.54021700 | -1.43253500 | -1.50179600 |
| B | 0.90082500  | -1.99662600 | 0.02999100  | H | -5.60364300 | -1.93185300 | -1.64092600 |
| H | -0.11123100 | -2.39455600 | 0.49086400  | B | -3.14065100 | -1.49010600 | -2.59001700 |
| B | 2.40005200  | -2.32796100 | 0.90428400  | H | -3.21516600 | -2.01884400 | -3.64697300 |
| H | 2.46463600  | -2.86946000 | 1.95162400  | C | 0.39059200  | 2.45516500  | 0.62861900  |
| B | 3.81639900  | -0.57805500 | -0.88750500 | C | -0.78704200 | 3.17046800  | 0.80324500  |
| H | 4.86010300  | -0.03270700 | -1.02728900 | C | 1.44388000  | 2.54183900  | 1.53334200  |
| B | 2.31773400  | -0.26884600 | -1.78530800 | C | -0.93926200 | 3.93406100  | 1.95378100  |
| H | 2.29921800  | 0.50376900  | -2.68380100 | H | -1.56546700 | 3.14101900  | 0.05645600  |
| B | 1.30887500  | -1.73091000 | -1.67900100 | C | 1.26557600  | 3.31007700  | 2.67861400  |
| H | 0.54560900  | -2.02885400 | -2.53159400 | H | 2.36635700  | 2.00145100  | 1.36809900  |
| B | 2.20021300  | -2.94724800 | -0.72548100 | C | 0.07956700  | 3.99928500  | 2.89648000  |
| H | 2.09490800  | -4.11471200 | -0.89076400 | H | -1.86130700 | 4.48504300  | 2.10179900  |
| B | 3.74937100  | -2.21991600 | -0.23368700 | H | 2.07124200  | 3.36330100  | 3.40144400  |
| H | 4.75480000  | -2.78028100 | 0.04072300  | H | -0.04474800 | 4.59744200  | 3.79134500  |
| B | 3.07772000  | -1.87489200 | -1.84445900 | I | 0.96394500  | 2.04525400  | -1.68640900 |
| H | 3.61329900  | -2.27864400 | -2.82073600 | O | 1.31132300  | -2.10495400 | -0.03668300 |
| O | -1.92952700 | -0.67690500 | -1.02212900 | O | 2.53244000  | -0.16074000 | 0.76879600  |
| O | -3.03471800 | 1.38645700  | -0.42360900 | C | 3.82518600  | -1.83689200 | -0.79280600 |
| C | -3.53965200 | -0.75764700 | 1.05018600  | S | 2.57347400  | -1.63120300 | 0.56238200  |
| S | -3.25346600 | -0.04995000 | -0.64831000 | O | 3.07454700  | -2.40724500 | 1.67923400  |
| O | -4.37252500 | -0.47837200 | -1.43925900 | F | 5.00054600  | -1.34904900 | -0.41419200 |
| F | -4.66153200 | -0.27635600 | 1.56440700  | F | 3.42596600  | -1.18883600 | -1.88450500 |
| F | -2.52826500 | -0.43106800 | 1.86553700  | F | 3.96928500  | -3.12323900 | -1.09075200 |
| F | -3.61718600 | -2.07915000 | 0.99261900  |   |             |             |             |

## TS B2-B3

|    |             |             |            |
|----|-------------|-------------|------------|
| Pd | 0.28770400  | 0.29847700  | 0.15089100 |
| O  | -0.26184100 | -0.71187300 | 2.02578900 |
| C  | -2.97999500 | -0.10018100 | 0.35871200 |
| C  | -3.89225300 | -1.44590500 | 0.06985700 |
| C  | -3.00706000 | 0.48613700  | 1.75520800 |
| H  | -2.15669600 | 1.15365900  | 1.88166300 |
| H  | -3.92943400 | 1.04505200  | 1.91079900 |
| H  | -2.93170700 | -0.29270900 | 2.51320800 |
| C  | -4.66424500 | -2.04613800 | 1.22429400 |
| H  | -5.25187100 | -2.88454200 | 0.85199000 |
| H  | -3.99063100 | -2.40939800 | 2.00089700 |
| H  | -5.34368000 | -1.31389300 | 1.65992900 |
| C  | -0.63203900 | -1.89068800 | 2.06795300 |
| C  | -0.04473700 | -2.82369100 | 3.07936100 |
| H  | -0.60421800 | -3.75417100 | 3.17986800 |
| H  | 0.98054200  | -3.04002700 | 2.76134200 |

## B3

|    |             |             |             |
|----|-------------|-------------|-------------|
| Pd | 0.30755400  | 0.42113100  | 0.20440100  |
| O  | -0.19337900 | -0.66075800 | 2.01826000  |
| C  | -2.92982700 | -0.31347500 | 0.26531900  |
| C  | -3.68057500 | -1.74932400 | -0.05999900 |
| C  | -3.07985200 | 0.24206700  | 1.66733100  |
| H  | -2.33489600 | 1.01599100  | 1.83595100  |
| H  | -4.07124900 | 0.67594300  | 1.79111100  |
| H  | -2.93790000 | -0.53373400 | 2.41898800  |
| C  | -4.41489400 | -2.44091400 | 1.06858600  |
| H  | -4.89461600 | -3.33599400 | 0.67432500  |
| H  | -3.73259200 | -2.73298600 | 1.86716100  |
| H  | -5.18369500 | -1.79080600 | 1.48519300  |
| C  | -0.50568100 | -1.86058200 | 2.06702600  |
| C  | 0.02991000  | -2.71713800 | 3.16846900  |
| H  | -0.51504800 | -3.65475000 | 3.28119800  |
| H  | 1.07946300  | -2.91961400 | 2.92859100  |
| H  | 0.00543800  | -2.15139600 | 4.09939400  |

|   |             |             |             |   |             |             |             |
|---|-------------|-------------|-------------|---|-------------|-------------|-------------|
| N | -1.31472400 | -2.41693400 | 1.14971300  | H | -0.99113400 | -3.61509000 | -0.15427000 |
| H | -1.40254200 | -3.42106600 | 1.18851900  | B | -1.78168200 | -1.66215700 | -0.54173000 |
| B | -1.93154200 | -1.72316500 | 0.00593800  | B | -1.74773900 | 0.13336300  | -0.36850900 |
| B | -1.48292900 | -0.15309500 | -0.69062600 | B | -3.45737900 | 0.67990500  | -0.46044700 |
| B | -2.98422600 | 0.70060800  | -1.10410600 | H | -3.85646000 | 1.53293500  | 0.24772900  |
| H | -3.11618000 | 1.85472700  | -0.90878200 | B | -4.51802900 | -0.70812900 | -0.66976900 |
| B | -4.37101200 | -0.31483100 | -0.69043400 | H | -5.53291000 | -0.85160700 | -0.08451900 |
| H | -5.34483300 | 0.09176700  | -0.16228200 | B | -2.45692200 | -2.06474300 | -2.11880800 |
| B | -2.80032200 | -2.64766100 | -1.21441200 | H | -2.16486900 | -3.12811200 | -2.55168800 |
| H | -2.80216800 | -3.82525700 | -1.07916700 | B | -1.38110400 | -0.66892700 | -1.94595500 |
| B | -1.41178400 | -1.63638100 | -1.67860300 | H | -0.28315500 | -0.70927900 | -2.37831100 |
| H | -0.37569500 | -2.12030900 | -1.97035200 | B | -2.40930300 | 0.78842300  | -1.88996700 |
| B | -2.06560800 | -0.13168200 | -2.37818700 | H | -2.03154400 | 1.83276000  | -2.29397600 |
| H | -1.49968100 | 0.47199100  | -3.21732700 | B | -4.10603700 | 0.27609800  | -2.06053800 |
| B | -3.83856700 | -0.23301900 | -2.35720300 | H | -4.93733800 | 0.95191600  | -2.56321600 |
| H | -4.52429400 | 0.30886800  | -3.15535400 | B | -4.12664300 | -1.49151400 | -2.20130300 |
| B | -4.28788000 | -1.79289300 | -1.64630600 | H | -4.95683700 | -2.17074500 | -2.69967100 |
| H | -5.28937700 | -2.39987200 | -1.81219200 | B | -2.82853600 | -0.55937500 | -2.97149400 |
| B | -2.86772400 | -1.68472600 | -2.69991900 | H | -2.73877000 | -0.48871000 | -4.14930800 |
| H | -2.85577500 | -2.20715900 | -3.76207400 | C | -1.13922300 | 1.55521400  | 1.13965300  |
| C | -0.29813700 | 2.13411700  | 1.02224200  | C | -1.55058100 | 2.80670600  | 0.66335600  |
| C | -1.11064500 | 3.12428500  | 0.49217000  | C | -1.27303900 | 1.28113900  | 2.50783300  |
| C | 0.24733800  | 2.25087600  | 2.29556400  | C | -2.10064800 | 3.74148200  | 1.52373800  |
| C | -1.43751200 | 4.22161900  | 1.28238500  | H | -1.46394500 | 3.04230900  | -0.38716400 |
| H | -1.47423200 | 3.06216900  | -0.52200100 | C | -1.82382500 | 2.22472700  | 3.36603700  |
| C | -0.08033400 | 3.36088100  | 3.06917900  | H | -0.92678200 | 0.33907900  | 2.91053600  |
| H | 0.92100300  | 1.49678300  | 2.68604800  | C | -2.24374900 | 3.45384200  | 2.87617200  |
| C | -0.93090100 | 4.33872300  | 2.57046400  | H | -2.41728900 | 4.70088400  | 1.13165600  |
| H | -2.07770100 | 4.99555700  | 0.87406500  | H | -1.90960400 | 1.99900300  | 4.42281100  |
| H | 0.34301600  | 3.45659600  | 4.06258000  | H | -2.67053600 | 4.19006400  | 3.54776700  |
| H | -1.18284400 | 5.20089900  | 3.17717200  | I | 1.19749900  | 2.21762700  | -1.24945200 |
| I | 1.07404000  | 1.75383000  | -1.86179700 | O | 1.91625000  | -0.86134800 | -0.30533800 |
| O | 1.45675400  | -1.53739100 | -0.22445800 | O | 3.14152000  | -0.30625600 | 1.76057400  |
| O | 2.59082500  | 0.08828100  | 1.16135100  | C | 4.52731000  | -0.74226700 | -0.46254500 |
| C | 4.09569300  | -1.37412400 | -0.47870400 | S | 3.07536200  | -1.18463400 | 0.61026700  |
| S | 2.63423600  | -1.29974900 | 0.66644600  | O | 3.19103100  | -2.61780700 | 0.82377500  |
| O | 2.86924200  | -2.34428400 | 1.64387000  | F | 5.65116800  | -1.06540400 | 0.16885400  |
| F | 5.20861700  | -1.16040500 | 0.21153100  | F | 4.53684900  | 0.55782500  | -0.71520100 |
| F | 3.99239400  | -0.45746900 | -1.42741700 | F | 4.47406500  | -1.40653900 | -1.61074500 |
| F | 4.15932800  | -2.57473400 | -1.04213600 |   |             |             |             |

## TS B3-B4

|    |             |             |             |
|----|-------------|-------------|-------------|
| Pd | 0.29320000  | 0.35264600  | 0.32338500  |
| O  | -0.04586900 | -1.28334900 | 1.69748800  |
| C  | -3.07554100 | -0.80429400 | 0.27807300  |
| C  | -3.46216600 | -2.05695800 | -0.74119800 |
| C  | -3.31353000 | -1.02959700 | 1.75592000  |
| H  | -3.44758600 | -0.06138500 | 2.23399000  |
| H  | -4.21717900 | -1.61805200 | 1.91052400  |
| H  | -2.47230900 | -1.52888200 | 2.23138800  |
| C  | -3.94744700 | -3.35600600 | -0.13125500 |
| H  | -3.85233500 | -4.14884800 | -0.87315900 |
| H  | -3.36419700 | -3.62966400 | 0.74839800  |
| H  | -4.99612700 | -3.27757300 | 0.15343400  |
| C  | -0.22578000 | -2.43830300 | 1.27483300  |
| C  | 0.41489100  | -3.59328900 | 1.96854500  |
| H  | -0.09062000 | -4.53846400 | 1.76799800  |
| H  | 1.45309100  | -3.63680100 | 1.61740300  |
| H  | 0.44134600  | -3.39229000 | 3.03870600  |
| N  | -0.99552900 | -2.66960100 | 0.19762800  |

## B4

|   |             |             |             |
|---|-------------|-------------|-------------|
| O | -1.50475900 | 1.96641700  | 1.01234700  |
| C | 1.00558500  | -0.22750200 | 0.97272200  |
| C | 2.32031500  | 0.56032900  | 0.35472300  |
| C | 0.41572800  | 0.24480200  | 2.28636600  |
| H | -0.65716100 | 0.06940000  | 2.27941000  |
| H | 0.87834400  | -0.29418100 | 3.11279200  |
| H | 0.55506700  | 1.31498500  | 2.42480800  |
| C | 2.79962100  | 1.80890500  | 1.05850800  |
| H | 3.73144600  | 2.13372600  | 0.59674800  |
| H | 2.06371200  | 2.60859100  | 0.96140000  |
| H | 2.98384700  | 1.61790600  | 2.11546700  |
| C | -1.02262000 | 2.46588700  | 0.02308400  |
| C | -1.63601500 | 3.67746300  | -0.64746400 |
| H | -0.88090100 | 4.40489800  | -0.95507000 |
| H | -2.17887100 | 3.35158800  | -1.53945000 |
| H | -2.33867900 | 4.14208400  | 0.04055300  |
| N | 0.10865100  | 1.98154400  | -0.60006800 |
| H | 0.38065100  | 2.49501000  | -1.42500900 |
| B | 0.76909900  | 0.67558100  | -0.48231600 |

|   |             |             |             |   |             |             |             |
|---|-------------|-------------|-------------|---|-------------|-------------|-------------|
| B | 0.03852600  | -0.93952600 | -0.29631100 | H | 0.37432800  | -3.42962600 | -3.08340300 |
| B | 1.15793400  | -1.90213800 | 0.69143800  | H | 0.96372000  | -3.72526100 | -1.44038200 |
| H | 0.72640400  | -2.62278000 | 1.52504900  | N | -1.32330600 | -2.07704400 | -0.62335800 |
| B | 2.58213900  | -0.94629500 | 1.10952100  | H | -1.52648500 | -2.95860900 | -0.17827000 |
| H | 3.07106600  | -0.93345500 | 2.18443200  | B | -1.94564900 | -0.84232500 | -0.11715500 |
| B | 2.31624700  | 0.47617400  | -1.33815300 | B | -1.28908500 | 0.16741000  | 1.20839200  |
| H | 2.72172100  | 1.42608400  | -1.92168100 | B | -2.64953800 | 0.65474200  | 2.22448800  |
| B | 0.91436600  | -0.50923100 | -1.78438300 | H | -2.53218700 | 0.64203800  | 3.40058100  |
| H | 0.32590800  | -0.30329300 | -2.79382400 | B | -4.13719600 | -0.02660200 | 1.54103500  |
| B | 1.13709600  | -2.11650900 | -1.06578200 | H | -4.98525600 | -0.53617700 | 2.18584600  |
| H | 0.68157700  | -3.09439900 | -1.55587000 | B | -3.04507700 | 0.17633500  | -1.08950900 |
| B | 2.68478500  | -2.12168200 | -0.19182800 | H | -3.20869500 | -0.14657000 | -2.21479100 |
| H | 3.34442700  | -3.09435700 | -0.04314000 | B | -1.55296600 | 0.85316000  | -0.40813800 |
| B | 3.41887400  | -0.52021300 | -0.37795400 | H | -0.84926900 | 1.40667700  | -1.35378700 |
| H | 4.56553500  | -0.23523100 | -0.31167100 | B | -1.97663000 | 1.79195800  | 1.04558500  |
| B | 2.53087400  | -1.23997000 | -1.73246000 | H | -1.35052000 | 2.73377800  | 1.38635500  |
| H | 3.09730900  | -1.56820600 | -2.72049400 | B | -3.73892200 | 1.67161100  | 1.26548200  |
| C | -1.52690400 | -1.04642000 | -0.16337300 | H | -4.38929900 | 2.52045900  | 1.77166000  |
| C | -2.35136400 | -0.44234100 | -1.11762100 | B | -4.38927300 | 0.69181600  | -0.05766300 |
| C | -2.14360000 | -1.74405800 | 0.87821600  | H | -5.48762300 | 0.70783300  | -0.49433300 |
| C | -3.73421700 | -0.51896700 | -1.03021700 | B | -3.05035700 | 1.80775700  | -0.37726300 |
| H | -1.90158700 | 0.09624100  | -1.94581800 | H | -3.19124600 | 2.75935900  | -1.06267600 |
| C | -3.52708600 | -1.82033200 | 0.97592100  | H | -0.27232300 | -0.19455200 | 1.68220900  |
| H | -1.53534200 | -2.24217000 | 1.62588400  |   |             |             |             |
| C | -4.32723800 | -1.20515200 | 0.02224300  |   |             |             |             |
| H | -4.35145700 | -0.04242800 | -1.78405700 |   |             |             |             |
| H | -3.98109200 | -2.36398500 | 1.79706100  |   |             |             |             |
| H | -5.40734100 | -1.26482600 | 0.09665900  |   |             |             |             |

**C1**

|    |             |             |             |
|----|-------------|-------------|-------------|
| O  | -0.09157100 | 3.55365400  | -1.41653200 |
| C  | 0.74406800  | 3.39934900  | -0.54739400 |
| O  | 1.21444900  | 2.24251800  | -0.14640400 |
| C  | 1.36923900  | 4.54541700  | 0.21570500  |
| H  | 1.20526600  | 4.40607600  | 1.28569700  |
| H  | 2.44720700  | 4.55034500  | 0.04452200  |
| H  | 0.93160600  | 5.48490900  | -0.11583700 |
| Pd | 0.59728300  | 0.63080200  | -1.08517200 |
| O  | 2.52817600  | -0.12391900 | -0.94267300 |
| O  | 1.61077200  | -1.99769400 | 0.38007900  |
| C  | 3.32317800  | -0.37830200 | 1.55122200  |
| S  | 2.81898100  | -1.26817800 | -0.00264800 |
| O  | 3.97004500  | -2.03126400 | -0.41509600 |
| F  | 3.72626400  | -1.26383800 | 2.45778000  |
| F  | 2.28959400  | 0.29549100  | 2.05336400  |
| F  | 4.30961800  | 0.46887400  | 1.30690300  |
| O  | 0.11086100  | -1.12735700 | -2.10727200 |
| C  | -2.63284400 | -0.86318200 | 1.44278400  |
| C  | -3.66421100 | -0.84085300 | 0.11204400  |
| C  | -2.47071200 | -2.13928600 | 2.24289900  |
| H  | -1.40923600 | -2.36992800 | 2.34348600  |
| H  | -2.89587300 | -2.01010800 | 3.23696400  |
| H  | -2.97238600 | -2.98546500 | 1.76975700  |
| C  | -4.42848200 | -2.09259100 | -0.25948800 |
| H  | -5.25355000 | -1.80418600 | -0.90978100 |
| H  | -3.80072500 | -2.79670100 | -0.80655100 |
| H  | -4.84869300 | -2.58074600 | 0.61968000  |
| C  | -0.38322500 | -2.13761500 | -1.58717400 |
| C  | 0.07877900  | -3.48647700 | -2.03751500 |
| H  | -0.67674900 | -4.26057900 | -1.89717800 |

**TS C1-C2**

|    |             |             |             |
|----|-------------|-------------|-------------|
| O  | -0.50783800 | 3.31619500  | -1.29310100 |
| C  | 0.44357900  | 3.42738700  | -0.49702000 |
| O  | 1.10553400  | 2.42611000  | -0.05855900 |
| C  | 0.84038400  | 4.77561600  | 0.03136700  |
| H  | 0.10472500  | 5.06870000  | 0.78457900  |
| H  | 1.82719700  | 4.73883900  | 0.48705300  |
| H  | 0.80893500  | 5.50871200  | -0.77377100 |
| Pd | 0.56213600  | 0.70755800  | -0.96380100 |
| O  | 2.58575100  | 0.01981000  | -0.94019400 |
| O  | 1.79723600  | -1.99752300 | 0.23400300  |
| C  | 3.36655900  | -0.34914700 | 1.53516800  |
| S  | 2.95298400  | -1.15800600 | -0.08700200 |
| O  | 4.16064500  | -1.81634400 | -0.52089400 |
| F  | 3.75856200  | -1.26716000 | 2.41372900  |
| F  | 2.28999700  | 0.26868100  | 2.02829900  |
| F  | 4.33410400  | 0.54353700  | 1.38580200  |
| O  | 0.13996800  | -1.00442700 | -2.07719300 |
| C  | -2.65448800 | -1.04613000 | 1.41276600  |
| C  | -3.58749700 | -0.96761800 | 0.01559600  |
| C  | -2.53360800 | -2.36003600 | 2.15688900  |
| H  | -1.47914900 | -2.59548300 | 2.30814500  |
| H  | -3.01380000 | -2.27958200 | 3.13087800  |
| H  | -3.00517100 | -3.18162400 | 1.61475100  |
| C  | -4.30099500 | -2.20939700 | -0.47037900 |
| H  | -5.04554800 | -1.90634000 | -1.20547400 |
| H  | -3.61143500 | -2.90151100 | -0.95471700 |
| H  | -4.81808100 | -2.71642400 | 0.34411400  |
| C  | -0.26634000 | -2.07747700 | -1.60800700 |
| C  | 0.26343100  | -3.36430400 | -2.15316500 |
| H  | -0.44932000 | -4.18439800 | -2.05683700 |
| H  | 0.53950900  | -3.22122500 | -3.19609600 |
| H  | 1.16768800  | -3.59248900 | -1.58190500 |
| N  | -1.18146400 | -2.12650500 | -0.62110100 |
| H  | -1.31580300 | -3.03209100 | -0.19945700 |
| B  | -1.85977700 | -0.93460100 | -0.08958700 |

B -1.31105300 0.00843400 1.31889100  
 B -2.74215000 0.43085200 2.26447300  
 H -2.70772400 0.36243100 3.44430200  
 B -4.16977000 -0.23069200 1.44535600  
 H -5.05637700 -0.77681800 2.00308700  
 B -2.89457300 0.11640600 -1.09198500  
 H -2.98681400 -0.15920800 -2.23804200  
 B -1.45071200 0.77667000 -0.28424600  
 H -0.69085800 1.82502200 -1.21615100  
 B -2.00468900 1.62893200 1.18628600  
 H -1.41809200 2.55971500 1.62187900  
 B -3.77561700 1.48220600 1.28049200  
 H -4.47179600 2.30027400 1.77722900  
 B -4.31755700 0.55968000 -0.13047600  
 H -5.38385100 0.58941900 -0.64053700  
 B -2.97867800 1.70341900 -0.30320300  
 H -3.10752100 2.68896700 -0.94034500  
 H -0.32009600 -0.36491000 1.83966200

**C2**

Pd 0.71650000 0.79388500 -0.31917400  
 O 2.03321300 -0.75521100 -0.84274500  
 O 4.35122300 -0.47229200 -1.69432100  
 C 3.98897100 -0.66692500 0.91469100  
 S 3.36936400 -0.05743900 -0.73042100  
 O 3.12481800 1.37888600 -0.52840800  
 F 5.15312100 -0.09766400 1.19979700  
 F 4.14530200 -1.98328100 0.88884900  
 F 3.11828100 -0.35996600 1.87635400  
 O -0.46462600 2.45010900 0.15560700  
 C -3.57215600 -0.65096400 -0.67791600  
 C -3.31364000 -0.81281000 0.97966200  
 C -4.83946600 0.01787400 -1.16748200  
 H -4.58691800 0.76011000 -1.92526900  
 H -5.50630100 -0.71970300 -1.61158900  
 H -5.37817100 0.51550500 -0.35882100  
 C -4.35268600 -0.29147500 1.94740600  
 H -4.19624400 -0.78029900 2.90829300  
 H -4.25084100 0.78422400 2.10096200  
 H -5.36577300 -0.51930800 1.61595400  
 C -1.66444300 2.71011600 0.27157500  
 C -2.06319000 4.14721400 0.46112500  
 H -3.13511200 4.28359300 0.60748800  
 H -1.52557600 4.54300400 1.32359000  
 H -1.74057700 4.71271100 -0.41470900  
 N -2.64375800 1.78170800 0.23687800  
 H -3.58312900 2.14163400 0.29402600  
 B -2.39702900 0.33400100 0.07241400  
 B -2.09363500 -0.41572700 -1.50157600  
 B -2.90423500 -1.98421200 -1.51155300  
 H -3.48859200 -2.34410500 -2.47539900  
 B -3.70769000 -2.19865100 0.05603900  
 H -4.80019700 -2.63111200 0.18281400  
 B -1.65966900 -0.67269600 1.33569400  
 H -1.38973400 -0.13249700 2.35383500  
 B -0.85164600 -0.43237900 -0.23145300  
 B -1.15314300 -1.88633500 -1.22289900  
 H -0.38015600 -2.26398800 -2.03402700  
 B -2.16394800 -3.00230300 -0.26382000  
 H -2.13116400 -4.17976800 -0.38130900

B -2.45907800 -2.25099600 1.31096200  
 H -2.72408200 -2.79251000 2.32873500  
 B -0.87904000 -2.04611400 0.52937000  
 H 0.09298500 -2.53901200 0.98898000  
 H -2.13508400 0.30502500 -2.43924500

**TS C2-C3**

Pd -0.68832800 -0.33420200 -0.22639400  
 O -1.09915400 1.46066200 0.82202200  
 O -0.76143300 2.16306800 -1.47985300  
 C -0.45220300 3.98820100 0.44413800  
 S -1.40679600 2.52882900 -0.22049400  
 O -2.77415900 2.97407800 -0.22192900  
 F -0.83723100 5.08464600 -0.19523500  
 F 0.85815900 3.83907300 0.26039600  
 F -0.68430200 4.13933300 1.74137200  
 O 0.06801200 -1.73682500 -1.70718600  
 C 3.81218700 0.42700800 -0.47944300  
 C 3.79287500 -1.17702200 0.00536200  
 C 4.70002600 0.84099400 -1.63517100  
 H 4.16397200 1.55750300 -2.25837100  
 H 5.60690800 1.31634300 -1.26447300  
 H 4.99219800 -0.01158700 -2.25182100  
 C 4.64646200 -2.17490200 -0.74389800  
 H 4.69860300 -3.09102700 -0.15677900  
 H 4.20888400 -2.41890500 -1.71317400  
 H 5.66116200 -1.80286000 -0.88569700  
 C 0.97089700 -1.54311700 -2.52924500  
 C 0.77570800 -2.00602300 -3.94235400  
 H 0.30915800 -2.99025600 -3.92491100  
 H 0.07332100 -1.31977100 -4.42228800  
 H 1.70273300 -2.03885600 -4.51572900  
 N 2.12732200 -0.92131100 -2.21108000  
 H 2.75176300 -0.71955000 -2.97588000  
 B 2.43038200 -0.49646700 -0.83273700  
 B 2.28422500 1.16723100 -0.24939800  
 B 3.61325800 1.45381200 0.87368200  
 H 4.19608400 2.48233900 0.84537200  
 B 4.57863600 -0.03014300 0.99770400  
 H 5.75969800 -0.04368500 0.99484200  
 B 2.24536300 -1.60234400 0.54584300  
 H 1.88649400 -2.70143900 0.30440900  
 B 1.27353000 -0.11485300 0.42017200  
 B 1.98722900 1.10113400 1.49953000  
 H 1.35176300 1.93419400 2.03994500  
 B 3.41753800 0.36762200 2.26543200  
 H 3.80749100 0.67513700 3.33973300  
 B 3.55922100 -1.29877800 1.68728400  
 H 4.08852100 -2.20855300 2.22656400  
 B 1.94689400 -0.61274300 1.98674800  
 H 1.27126500 -1.02515400 2.86576000  
 H 1.96823500 1.96662400 -1.05599100  
 C -1.59038600 -1.73971900 3.58832400  
 C -1.71331100 -0.99501700 2.41922300  
 C -1.32072300 -1.59816500 1.24022700  
 C -0.90433900 -2.91270200 1.14834000  
 C -0.78486400 -3.63145000 2.33444200  
 C -1.12021100 -3.04706700 3.54964000  
 H -1.86968900 -1.28506000 4.53183500  
 H -2.07439900 0.02472200 2.42926300

|   |             |             |             |   |            |             |             |
|---|-------------|-------------|-------------|---|------------|-------------|-------------|
| H | -0.67180700 | -3.35975400 | 0.19141900  | F | 3.53605800 | -3.14113800 | -1.11400400 |
| H | -0.44112100 | -4.65910000 | 2.29606400  | F | 4.94721300 | -1.98725900 | 0.04775100  |
| H | -1.03205200 | -3.61690500 | 4.46713800  | F | 3.78911100 | -1.03289500 | -1.50446400 |
| I | -3.24865000 | -1.09466000 | -0.86074800 |   |            |             |             |

## C3

|    |             |             |             |
|----|-------------|-------------|-------------|
| Pd | 0.41247600  | 0.54674300  | 0.22477400  |
| O  | -0.13988100 | -0.30578700 | 2.15872100  |
| C  | -3.83433500 | -0.97380400 | 0.31753700  |
| C  | -3.11626900 | -2.08444200 | -0.71520800 |
| C  | -4.62847900 | -1.47438200 | 1.50296100  |
| H  | -3.97277300 | -1.87987800 | 2.27430500  |
| H  | -5.16966500 | -0.63055200 | 1.92931000  |
| H  | -5.35565900 | -2.22954600 | 1.20497300  |
| C  | -3.29550800 | -3.56617000 | -0.45364000 |
| H  | -3.94927500 | -4.00156500 | -1.20771200 |
| H  | -2.32677200 | -4.06471000 | -0.50886100 |
| H  | -3.73733200 | -3.75564100 | 0.52638900  |
| C  | -0.62899900 | -1.42525200 | 2.34020900  |
| C  | -0.18541300 | -2.25255600 | 3.50508600  |
| H  | -0.90965800 | -3.02062100 | 3.77939800  |
| H  | 0.76379300  | -2.71828200 | 3.21782600  |
| H  | 0.00646400  | -1.59409400 | 4.35084900  |
| N  | -1.54523900 | -1.94614700 | 1.49645700  |
| H  | -1.76345600 | -2.91956900 | 1.63985500  |
| B  | -2.10949100 | -1.22119900 | 0.34839300  |
| B  | -2.85460300 | 0.40256000  | 0.46809800  |
| B  | -4.31855400 | 0.41254700  | -0.53427800 |
| H  | -5.28944000 | 0.96279700  | -0.14392800 |
| B  | -4.49645600 | -1.19704400 | -1.24050300 |
| H  | -5.51478100 | -1.79097300 | -1.31083200 |
| B  | -1.63304400 | -1.48568700 | -1.34662000 |
| H  | -0.78210100 | -2.28001700 | -1.52659100 |
| B  | -1.45916300 | 0.12395600  | -0.60006000 |
| B  | -2.81939800 | 1.12095200  | -1.15835300 |
| H  | -2.75494200 | 2.28787700  | -1.31920800 |
| B  | -3.84843500 | 0.11907500  | -2.21432000 |
| H  | -4.48111200 | 0.56290400  | -3.11042100 |
| B  | -3.11248400 | -1.48899000 | -2.30995500 |
| H  | -3.24630900 | -2.28541100 | -3.17366000 |
| B  | -2.07606200 | -0.04804000 | -2.27502100 |
| H  | -1.46245700 | 0.26064300  | -3.23355200 |
| H  | -2.82423800 | 0.93363200  | 1.52261400  |
| I  | 1.19061100  | 1.64974500  | -1.96112900 |
| C  | 0.04701100  | 2.35465400  | 0.97229100  |
| C  | 0.74935100  | 2.49783600  | 2.16229500  |
| C  | -0.74415500 | 3.37327800  | 0.47103000  |
| C  | 0.61588800  | 3.68159600  | 2.88227700  |
| H  | 1.39415800  | 1.70802900  | 2.53239300  |
| C  | -0.87532700 | 4.54602100  | 1.20818900  |
| H  | -1.23854100 | 3.27739200  | -0.48296900 |
| C  | -0.20250400 | 4.70073300  | 2.41291800  |
| H  | 1.15845600  | 3.79903300  | 3.81352500  |
| H  | -1.49776700 | 5.34585500  | 0.82266400  |
| H  | -0.30352600 | 5.62077000  | 2.97715200  |
| O  | 2.72672400  | -0.22127300 | 1.16629500  |
| O  | 2.49714800  | -2.65788300 | 1.65347700  |
| C  | 3.76567000  | -1.95656500 | -0.55631000 |
| S  | 2.43812200  | -1.57818300 | 0.68629100  |
| O  | 1.18760700  | -1.57324300 | -0.13816500 |

## TS C3-C4

|    |             |             |             |
|----|-------------|-------------|-------------|
| Pd | -0.08969800 | 0.89180600  | 0.71602900  |
| O  | -0.43255800 | -0.40006500 | 2.41830600  |
| C  | -2.20064500 | -2.99430800 | -0.35140600 |
| C  | -0.87313200 | -2.78070900 | -1.34928700 |
| C  | -2.31982200 | -4.26910000 | 0.45336000  |
| H  | -2.21197200 | -5.14722300 | -0.18288600 |
| H  | -1.57829800 | -4.30313400 | 1.25160700  |
| H  | -3.31047600 | -4.29563500 | 0.90583900  |
| C  | 0.19192200  | -3.85585900 | -1.42745500 |
| H  | 0.01730900  | -4.64697200 | -0.69598200 |
| H  | 0.19157600  | -4.30412100 | -2.41973000 |
| H  | 1.16881000  | -3.40773000 | -1.23559500 |
| C  | 0.07842900  | -1.53137300 | 2.32607600  |
| C  | 0.93016100  | -2.05458700 | 3.43598800  |
| H  | 0.47284200  | -1.78328600 | 4.38728100  |
| H  | 1.08181800  | -3.13182200 | 3.37867200  |
| H  | 1.90042600  | -1.55085400 | 3.37346200  |
| N  | -0.09756600 | -2.28885200 | 1.23035900  |
| H  | 0.62504600  | -2.98060200 | 1.07727400  |
| B  | -0.95071000 | -1.88103800 | 0.10105900  |
| B  | -2.67824000 | -1.50626000 | 0.31971300  |
| B  | -3.57772800 | -2.25947200 | -1.01147700 |
| H  | -4.61684600 | -2.77838200 | -0.79048100 |
| B  | -2.41615200 | -3.10007100 | -2.04504400 |
| H  | -2.58336100 | -4.17752500 | -2.49791700 |
| B  | -0.41657100 | -1.13414000 | -1.42921000 |
| H  | 0.73399200  | -0.92602500 | -1.55441400 |
| B  | -1.57688200 | -0.27919700 | -0.37107800 |
| B  | -3.21256900 | -0.52874000 | -1.05868000 |
| H  | -4.08477400 | 0.25775000  | -0.93288600 |
| B  | -3.04281800 | -1.52373300 | -2.52761400 |
| H  | -3.77058000 | -1.43352300 | -3.45644500 |
| B  | -1.32159600 | -1.89238400 | -2.73699200 |
| H  | -0.76753000 | -2.16205900 | -3.74528500 |
| B  | -1.81312700 | -0.29643700 | -2.13507000 |
| H  | -1.65290300 | 0.67366100  | -2.79200600 |
| H  | -3.09544300 | -1.53156900 | 1.42460000  |
| I  | 0.75340500  | 2.59841900  | -1.04996000 |
| C  | -2.00334000 | 1.57387300  | 0.67817800  |
| C  | -2.67319700 | 1.39893700  | 1.89759200  |
| C  | -2.54859400 | 2.44881700  | -0.27024100 |
| C  | -3.85789900 | 2.07413300  | 2.15101100  |
| H  | -2.27688900 | 0.72417900  | 2.64288200  |
| C  | -3.72813900 | 3.12631000  | -0.00419000 |
| H  | -2.07615400 | 2.57848500  | -1.23183400 |
| C  | -4.38791400 | 2.94096700  | 1.20332700  |
| H  | -4.36452100 | 1.92248200  | 3.09723700  |
| H  | -4.13452400 | 3.79546000  | -0.75367000 |
| H  | -5.31497000 | 3.46602700  | 1.40376200  |
| O  | 3.93315200  | -0.93160500 | 1.84743600  |
| O  | 2.48060600  | -2.00153900 | 0.15366400  |
| C  | 3.98900300  | 0.00401500  | -0.63380900 |
| S  | 3.01184300  | -0.77107100 | 0.74304200  |
| O  | 1.96192200  | 0.24786300  | 1.03925600  |
| F  | 3.25842300  | 0.05489400  | -1.74346000 |

F 5.06908000 -0.73200600 -0.87412500  
 F 4.36611000 1.22885600 -0.30422600

**C4**

O -0.07806800 2.96401200 -1.05556600  
 C -2.10432400 0.31654300 -0.58906700  
 C -2.09191000 -0.21720700 0.96574100  
 C -2.81326900 1.61674900 -0.90379800  
 H -2.39415000 2.02905300 -1.81889600  
 H -3.88264900 1.44806400 -1.02850600  
 H -2.64948300 2.35249200 -0.11670600  
 C -2.75366800 0.63978300 2.02115900  
 H -2.74620300 0.09963800 2.96730100  
 H -2.21277200 1.57862800 2.14839600  
 H -3.78797500 0.85791400 1.75534700  
 C 0.35938200 2.73468100 0.04973100  
 C 1.40834900 3.60242900 0.70767100  
 H 2.37348500 3.09122100 0.63747600  
 H 1.46922800 4.55277700 0.18207600  
 H 1.19174200 3.77452700 1.76467700  
 N -0.03854200 1.64560300 0.79994400  
 H 0.46987100 1.53003500 1.66479700  
 B -0.60270200 0.40289500 0.26665200  
 B -0.66879800 -0.14210200 -1.41063900  
 B -2.18885800 -1.00324800 -1.66645300  
 H -2.79048600 -0.83659900 -2.67144800  
 B -3.09681200 -1.03581300 -0.15141700  
 H -4.25839700 -0.83876400 -0.07139700  
 B -0.63679200 -1.03284800 1.29638200  
 H -0.18117200 -0.90936200 2.38491900  
 B 0.30323100 -1.04109600 -0.21987400  
 B -0.68169400 -1.91461900 -1.42425300  
 H -0.18322800 -2.50864500 -2.32018100  
 B -2.18716100 -2.45831500 -0.64437600  
 H -2.76890800 -3.43951500 -0.96397700  
 B -2.14625500 -1.91659500 1.04435700  
 H -2.70856600 -2.39008500 1.97181500  
 B -0.65313200 -2.46916900 0.26093400  
 H -0.13188000 -3.47477000 0.61251200  
 H -0.27231600 0.59328200 -2.24243200  
 C 1.87941200 -0.92631600 -0.16269800  
 C 2.64261400 -1.80971800 0.60607700  
 C 2.55436600 0.10361200 -0.82862000  
 C 4.02164400 -1.67216800 0.71026100  
 H 2.14882200 -2.62051300 1.13241200  
 C 3.93283800 0.24771600 -0.72843000  
 H 1.99384300 0.80436200 -1.44042200  
 C 4.67145300 -0.63982600 0.04510400  
 H 4.59065500 -2.37155900 1.31322500  
 H 4.43139300 1.05229700 -1.25857900  
 H 5.74703700 -0.52891500 0.12716400

**1, 10-o-phenanthroline**

C -2.68809500 -1.54344500 -0.00016600  
 H -3.17454100 -2.51580100 -0.00018200  
 C -3.46472400 -0.37276800 -0.00023700  
 H -4.54610200 -0.43680900 -0.00032300  
 C -2.81701300 0.83590200 -0.00019900

H -3.36999100 1.76978200 -0.00025100  
 C -1.41028800 0.86382200 -0.00009400  
 C -0.72895700 -0.37311100 -0.00007500  
 C 0.72895500 -0.37310700 0.00015300  
 C 1.41028600 0.86381900 0.00013800  
 C 0.67505200 2.09596300 0.00008700  
 H 1.22832200 3.02935000 0.00013200  
 C -0.67505200 2.09596400 -0.00001000  
 H -1.22832000 3.02935200 -0.00005600  
 C 2.81701600 0.83590100 0.00023100  
 H 3.36998800 1.76978400 0.00032900  
 C 3.46472600 -0.37276500 0.00022900  
 H 4.54610300 -0.43681300 0.00036900  
 C 2.68809100 -1.54344600 -0.00001200  
 H 3.17454500 -2.51579800 0.00012100  
 N -1.37340400 -1.55495800 -0.00008300  
 N 1.37340600 -1.55496000 0.00002600

**L-Pd-I**

Pd -0.73955700 -0.68543400 -0.00053900  
 C 1.60075600 -2.69072500 -0.00015900  
 H 0.83238600 -3.45548300 -0.00034400  
 C 2.96070300 -3.02803400 0.00008800  
 H 3.24435900 -4.07197500 0.00005600  
 C 3.90494400 -2.02998900 0.00033200  
 H 4.96214600 -2.26988500 0.00052100  
 C 3.49437200 -0.68123400 0.00034600  
 C 2.11787700 -0.43732900 0.00008000  
 C 1.61917200 0.89762800 -0.00000500  
 C 2.50848200 1.97676000 0.00016700  
 C 3.91883500 1.70759500 0.00049000  
 H 4.60295000 2.54782700 0.00064900  
 C 4.39154900 0.43861900 0.00057300  
 H 5.45831600 0.24928200 0.00081200  
 C 1.95509300 3.27222200 -0.00004400  
 H 2.60893300 4.13692400 0.00006000  
 C 0.59101600 3.42440400 -0.00040400  
 H 0.13073100 4.40330600 -0.00061200  
 C -0.23717300 2.29613300 -0.00054900  
 H -1.31280700 2.39088400 -0.00081200  
 N 1.19585600 -1.43212000 -0.00014900  
 N 0.26584000 1.06709300 -0.00033200  
 I -3.20175500 -0.01362300 0.00042100

**D2**

Pd 0.34775900 0.36521000 -0.04885100  
 O -0.52292300 2.25994500 -0.08698200  
 C -4.18095400 -0.15387400 0.37449200  
 C -2.66705400 -0.33203200 1.00938400  
 C -5.15203400 0.77219400 1.07722500  
 H -5.97743800 0.99832900 0.40248000  
 H -5.55937100 0.29770500 1.96906500  
 H -4.67434100 1.70790200 1.37157700  
 C -2.33695900 0.42872300 2.27627000  
 H -1.33268300 0.15359000 2.59616700  
 H -2.35831300 1.50642100 2.11159200  
 H -3.03829700 0.18013000 3.07237700  
 C -1.63683500 2.75818000 -0.31975000

|                 |             |             |             |   |             |             |             |
|-----------------|-------------|-------------|-------------|---|-------------|-------------|-------------|
| C               | -1.72859900 | 4.25014500  | -0.45600400 | C | 1.96904800  | 0.34145900  | 2.58402000  |
| H               | -2.75453200 | 4.61308600  | -0.51202000 | C | 2.37463600  | 0.93600100  | 3.90272500  |
| H               | -1.22542500 | 4.71346100  | 0.39318100  | H | 2.92027200  | 1.86264500  | 3.70729500  |
| H               | -1.19631200 | 4.54643300  | -1.36246800 | H | 1.47730400  | 1.19831000  | 4.46232100  |
| C               | 2.65283900  | 2.58290400  | 0.02891200  | H | 3.00363400  | 0.27439600  | 4.49834900  |
| H               | 1.81989400  | 3.27720500  | 0.03030800  | C | -1.75336900 | -1.08347400 | 2.65777900  |
| C               | 3.98261100  | 3.02587900  | 0.02545300  | H | -0.98840800 | -0.64272000 | 3.28870500  |
| H               | 4.19443800  | 4.08702100  | 0.02609600  | C | -2.80057000 | -1.83247600 | 3.20996300  |
| C               | 4.99198400  | 2.09572200  | 0.02062100  | H | -2.85580100 | -1.98109200 | 4.28048100  |
| H               | 6.03148400  | 2.40436200  | 0.01706200  | C | -3.74183600 | -2.36556500 | 2.36503700  |
| C               | 4.67607400  | 0.72289700  | 0.02101500  | H | -4.56496200 | -2.95638800 | 2.75119800  |
| C               | 3.31636000  | 0.37571700  | 0.02431700  | C | -3.64153600 | -2.14131600 | 0.97925600  |
| C               | 2.92229100  | -1.00829600 | 0.03021700  | C | -2.56016400 | -1.36515200 | 0.52587800  |
| C               | 3.91912700  | -1.99613900 | 0.04350300  | C | -2.41710300 | -1.09801300 | -0.88805000 |
| C               | 5.30204300  | -1.61238300 | 0.03257300  | C | -3.34376000 | -1.66566000 | -1.78161300 |
| H               | 6.05089500  | -2.39565700 | 0.03561900  | C | -4.43632000 | -2.44957900 | -1.28150600 |
| C               | 5.66761600  | -0.31126900 | 0.02046600  | H | -5.14103400 | -2.85921700 | -1.99566900 |
| H               | 6.71437000  | -0.03072400 | 0.01272100  | C | -4.58424800 | -2.67410700 | 0.04107300  |
| C               | 3.51423300  | -3.34377800 | 0.07075000  | H | -5.41187300 | -3.26648100 | 0.41362500  |
| H               | 4.26163200  | -4.12897700 | 0.07851800  | C | -3.15636800 | -1.45720500 | -3.15842400 |
| C               | 2.17729900  | -3.63803100 | 0.09179000  | H | -3.85715700 | -1.88758900 | -3.86486600 |
| H               | 1.81881600  | -4.65839800 | 0.11884700  | C | -2.08047100 | -0.72549200 | -3.58872000 |
| C               | 1.24607200  | -2.59397600 | 0.07135400  | H | -1.88631500 | -0.55971400 | -4.63984100 |
| H               | 0.19110800  | -2.81270800 | 0.07901200  | C | -1.21525200 | -0.18432300 | -2.63795600 |
| N               | -2.75475100 | 2.03626200  | -0.45138100 | H | -0.34512800 | 0.37612400  | -2.94718200 |
| H               | -3.58068100 | 2.55554200  | -0.70961000 | N | 2.64255600  | -0.73346800 | 2.14069000  |
| N               | 2.33535100  | 1.30339300  | 0.02880900  | H | 3.31683100  | -1.11999400 | 2.78405500  |
| N               | 1.58960800  | -1.31625500 | 0.03185700  | N | -1.63719800 | -0.86772900 | 1.36592600  |
| B               | -2.84169200 | 0.55747500  | -0.46208300 | N | -1.38221100 | -0.33821800 | -1.33682000 |
| B               | -4.13841600 | -0.25131300 | -1.33554500 | B | 2.35532900  | -1.49172700 | 0.90693000  |
| B               | -4.71996800 | -1.59844900 | -0.34552500 | B | 2.73813200  | -3.20788400 | 0.78652200  |
| H               | -5.87884800 | -1.82180400 | -0.28108800 | B | 3.42272000  | -3.52443500 | -0.81387100 |
| B               | -3.78816500 | -1.63775800 | 1.15569800  | H | 4.33931800  | -4.26206000 | -0.92376700 |
| H               | -4.25331200 | -1.81576400 | 2.22533300  | B | 3.46665100  | -2.00573800 | -1.71727400 |
| B               | -1.47862600 | -0.55210100 | -0.24034000 | H | 4.37483000  | -1.64844700 | -2.37971000 |
| B               | -2.43925900 | -0.55084500 | -1.75676700 | B | 1.12510000  | -1.08904100 | -0.29019600 |
| H               | -1.97788600 | -0.11676800 | -2.75822200 | B | 1.06901400  | -2.64523700 | 0.58762800  |
| B               | -3.60205400 | -1.89934600 | -1.69264400 | H | 0.26545800  | -2.85041800 | 1.43071100  |
| H               | -3.96353200 | -2.45556900 | -2.67233900 | B | 1.72261100  | -3.91082800 | -0.47975600 |
| B               | -3.37886800 | -2.74866600 | -0.14083700 | H | 1.35099400  | -5.03153300 | -0.40414800 |
| H               | -3.56914800 | -3.90716900 | 0.00651000  | B | 2.17462200  | -3.15343200 | -2.02519800 |
| B               | -2.09215700 | -1.90263100 | 0.75154700  | H | 2.12884000  | -3.71276600 | -3.06641500 |
| H               | -1.40163800 | -2.36366800 | 1.59683700  | B | 1.81228400  | -1.41669600 | -1.89685700 |
| B               | -1.97495600 | -2.08748500 | -1.01169200 | H | 1.60791500  | -0.66690900 | -2.78858600 |
| H               | -1.16970700 | -2.79743200 | -1.51403200 | B | 0.72628800  | -2.60551900 | -1.15188600 |
| H               | -4.90202000 | 0.44051600  | -1.92008900 | H | -0.35606200 | -2.80411800 | -1.58694900 |
| <b>TS D2-D3</b> |             |             |             | C | 1.35576700  | 3.38756600  | -2.68820200 |
| Pd              | -0.13044100 | 0.53098400  | 0.16467800  | C | 0.38474200  | 2.64202800  | -2.02533600 |
| O               | 1.05791400  | 0.88787000  | 1.95057200  | C | 0.50455700  | 2.43395100  | -0.65737200 |
| C               | 3.71583700  | -2.05286900 | -0.01052200 | C | 1.49022900  | 3.09144900  | 0.07485400  |
| C               | 2.79934900  | -0.83556800 | -0.64561500 | C | 2.44043900  | 3.84789400  | -0.59879700 |
| C               | 5.09736700  | -1.71413700 | 0.51057800  | C | 2.39482800  | 3.97921600  | -1.98233100 |
| H               | 5.42808300  | -2.50707000 | 1.18124400  | H | 1.26659100  | 3.53598800  | -3.75827800 |
| H               | 5.81119000  | -1.64143000 | -0.30900200 | H | -0.48095500 | 2.29197300  | -2.56740800 |
| H               | 5.09933000  | -0.76941900 | 1.05622300  | H | 1.51037800  | 3.01972800  | 1.15259400  |
| C               | 3.41583400  | 0.54155800  | -0.71544400 | H | 3.21159800  | 4.35429000  | -0.02897800 |
| H               | 2.86016300  | 1.14132800  | -1.43406600 | H | 3.13375100  | 4.57850100  | -2.49993600 |
| H               | 3.37544800  | 1.04875100  | 0.24690100  | I | -1.78126800 | 2.69211300  | 0.56963100  |
| H               | 4.45211800  | 0.48172400  | -1.04646200 | H | 3.20227100  | -3.71510400 | 1.75093000  |

|           |             |             |             |                 |             |             |             |
|-----------|-------------|-------------|-------------|-----------------|-------------|-------------|-------------|
| <b>D3</b> |             |             |             | C               | -0.81488300 | 2.15167200  | 2.22051200  |
|           |             |             |             | C               | -0.50692100 | 2.16040400  | 0.86959100  |
| Pd        | 0.28452800  | 0.57792900  | -0.13129000 | C               | -0.75133400 | 3.30029300  | 0.10961800  |
| O         | -0.81844900 | 1.15017800  | -1.80568600 | C               | -1.32658100 | 4.41448500  | 0.70967300  |
| C         | -3.95683600 | -1.44887700 | -0.12962700 | C               | -1.64820100 | 4.40767700  | 2.06200100  |
| C         | -2.98558000 | -0.27550900 | 0.53794500  | H               | -1.62300200 | 3.25091200  | 3.87439300  |
| C         | -5.20933400 | -1.02300400 | -0.86794400 | H               | -0.66002600 | 1.27352200  | 2.82884000  |
| H         | -5.59284100 | -1.87651900 | -1.42642800 | H               | -0.47857000 | 3.33916900  | -0.93572300 |
| H         | -5.97954300 | -0.70097300 | -0.16819500 | H               | -1.50233300 | 5.30257300  | 0.11341300  |
| H         | -5.01221700 | -0.20767300 | -1.56534000 | H               | -2.08887800 | 5.28306800  | 2.52362900  |
| C         | -3.47412600 | 1.15332300  | 0.40448300  | I               | 2.48475300  | 2.09558000  | -0.99230400 |
| H         | -3.17786200 | 1.71823800  | 1.28541800  | H               | -3.42216100 | -3.30616200 | -1.67101500 |
| H         | -3.04982900 | 1.65020900  | -0.46508300 |                 |             |             |             |
| H         | -4.56064100 | 1.17942100  | 0.33611000  | <b>TS D3-D4</b> |             |             |             |
| C         | -1.68703500 | 0.63270100  | -2.52991700 | Pd              | 0.28085300  | 0.57281100  | -0.28475700 |
| C         | -1.92512100 | 1.26880300  | -3.86710000 | O               | -0.82086100 | 0.69106700  | -2.06604800 |
| H         | -2.55289200 | 0.66379500  | -4.52116700 | C               | -3.87841100 | -1.65086200 | -0.10410700 |
| H         | -2.40809100 | 2.23515500  | -3.70311200 | C               | -3.28651800 | -0.11531400 | 0.14941000  |
| H         | -0.96362800 | 1.46363000  | -4.34213400 | C               | -4.86578900 | -1.86944000 | -1.23236900 |
| C         | 1.23584600  | -1.40769300 | -2.45439100 | H               | -5.86006000 | -1.53011700 | -0.94442800 |
| H         | 0.69141900  | -0.74717900 | -3.11828700 | H               | -4.57031000 | -1.34127000 | -2.13975300 |
| C         | 1.86382800  | -2.56236400 | -2.93394700 | H               | -4.92145000 | -2.93610800 | -1.44951600 |
| H         | 1.80068800  | -2.80691600 | -3.98597500 | C               | -3.85983800 | 0.97634900  | -0.72968500 |
| C         | 2.55368600  | -3.36180400 | -2.05485500 | H               | -3.78811900 | 1.92355500  | -0.19961800 |
| H         | 3.04551000  | -4.26555100 | -2.39623100 | H               | -3.32479700 | 1.07466600  | -1.67156200 |
| C         | 2.64860100  | -2.98561500 | -0.70201400 | H               | -4.91104500 | 0.78255200  | -0.93845300 |
| C         | 1.98426200  | -1.81329000 | -0.31759300 | C               | -1.35860300 | -0.27029200 | -2.64362300 |
| C         | 2.10941200  | -1.31997300 | 1.02055400  | C               | -1.36828100 | -0.27184100 | -4.14103600 |
| C         | 2.93462900  | -1.99691000 | 1.92844000  | H               | -1.81452400 | -1.16950700 | -4.56892800 |
| C         | 3.55026200  | -3.23049200 | 1.52970700  | H               | -1.92366200 | 0.60457200  | -4.48192500 |
| H         | 4.15313800  | -3.76065500 | 2.25746500  | H               | -0.34169900 | -0.15212600 | -4.49248200 |
| C         | 3.41041500  | -3.70902400 | 0.27312400  | C               | 1.35051400  | -2.27171400 | -1.89253700 |
| H         | 3.89671700  | -4.63041500 | -0.02454000 | H               | 0.74678500  | -1.95438600 | -2.73554000 |
| C         | 3.15317500  | -1.40603000 | 3.18497300  | C               | 2.03371600  | -3.49455100 | -1.93502400 |
| H         | 3.78114500  | -1.90681100 | 3.91290500  | H               | 1.95365700  | -4.12847300 | -2.80848700 |
| C         | 2.60455300  | -0.17783800 | 3.45190000  | C               | 2.79774900  | -3.85788500 | -0.85573600 |
| H         | 2.79383100  | 0.33848300  | 4.38320000  | H               | 3.33786400  | -4.79788500 | -0.84649300 |
| C         | 1.78121500  | 0.42922100  | 2.50158100  | C               | 2.90304900  | -2.98553200 | 0.24399200  |
| H         | 1.36355100  | 1.40849000  | 2.67444800  | C               | 2.17636900  | -1.78410500 | 0.18988700  |
| N         | -2.42922400 | -0.42584400 | -2.18090600 | C               | 2.31046500  | -0.82943800 | 1.26010300  |
| H         | -3.04926400 | -0.77249400 | -2.89787500 | C               | 3.21280000  | -1.09391000 | 2.30496400  |
| N         | 1.27380100  | -1.06554200 | -1.18410900 | C               | 3.88777500  | -2.35807000 | 2.35887300  |
| N         | 1.48945800  | -0.15098800 | 1.34816400  | H               | 4.54551300  | -2.55248600 | 3.19778800  |
| B         | -2.42371300 | -1.12209600 | -0.87404500 | C               | 3.73624600  | -3.26906000 | 1.37412300  |
| B         | -3.03734400 | -2.76957000 | -0.68778400 | H               | 4.26448600  | -4.21465500 | 1.40752000  |
| B         | -3.95726200 | -2.85911800 | 0.82079800  | C               | 3.46824000  | -0.07702500 | 3.24069600  |
| H         | -4.96719900 | -3.47095700 | 0.86011000  | H               | 4.16161800  | -0.26092200 | 4.05348400  |
| B         | -3.92882700 | -1.26576200 | 1.58264800  | C               | 2.88146600  | 1.15095000  | 3.07827300  |
| H         | -4.86254500 | -0.74770700 | 2.08349700  | H               | 3.10128500  | 1.98080900  | 3.73602800  |
| B         | -1.31513200 | -0.75266100 | 0.44627800  | C               | 1.97557300  | 1.33588700  | 2.03498500  |
| B         | -1.36073700 | -2.39218700 | -0.29117700 | H               | 1.50481400  | 2.29289600  | 1.86962900  |
| H         | -0.51353000 | -2.80778900 | -0.99753900 | N               | -1.93925800 | -1.28018900 | -1.98102300 |
| B         | -2.29289400 | -3.46531200 | 0.76283600  | H               | -2.28188300 | -2.04004900 | -2.55006500 |
| H         | -2.05587100 | -4.62281100 | 0.82383800  | N               | 1.39774600  | -1.45802100 | -0.86190400 |
| B         | -2.84154100 | -2.52143500 | 2.16271000  | N               | 1.64605100  | 0.36017900  | 1.19995400  |
| H         | -3.00631400 | -2.98051200 | 3.23998400  | B               | -2.22651600 | -1.32241300 | -0.52528100 |
| B         | -2.25225800 | -0.85952200 | 1.95850400  | B               | -2.70612800 | -2.82879200 | 0.26277600  |
| H         | -2.10151300 | -0.09986100 | 2.84353900  | B               | -4.04954000 | -2.49902300 | 1.36356400  |
| B         | -1.22931900 | -2.21786700 | 1.46555000  | H               | -4.95102500 | -3.25983500 | 1.43121500  |
| H         | -0.23628700 | -2.48000600 | 2.05717000  | B               | -4.42532200 | -0.77897000 | 1.27021300  |
| C         | -1.38336800 | 3.27595900  | 2.81728100  |                 |             |             |             |



|   |             |             |             |   |             |             |             |
|---|-------------|-------------|-------------|---|-------------|-------------|-------------|
| H | -5.51311000 | -0.32640600 | 1.22000000  | C | -2.17733100 | -3.63801500 | 0.09214300  |
| B | -1.61916800 | -0.16808300 | 0.70006600  | H | -1.81886300 | -4.65838200 | 0.11938200  |
| B | -1.29072800 | -1.94162800 | 0.83238000  | C | -1.24610400 | -2.59396900 | 0.07152600  |
| H | -0.22585900 | -2.40962400 | 0.66910700  | H | -0.19113700 | -2.81268900 | 0.07919900  |
| B | -2.40525600 | -2.65856700 | 2.00270700  | N | 2.75470300  | 2.03622000  | -0.45128900 |
| H | -2.08239000 | -3.59146100 | 2.65471400  | H | 3.58060700  | 2.55547700  | -0.70964400 |
| B | -3.46940000 | -1.37742500 | 2.61291100  | N | -2.33538200 | 1.30339600  | 0.02860900  |
| H | -3.92768300 | -1.36629300 | 3.70273000  | N | -1.58965600 | -1.31625100 | 0.03182000  |
| B | -3.01955800 | 0.13530200  | 1.80415200  | B | 2.84165800  | 0.55741100  | -0.46193800 |
| H | -3.24219600 | 1.21346000  | 2.22012400  | B | 1.47860600  | -0.55212100 | -0.24016700 |
| B | -1.75584100 | -1.01931700 | 2.26815900  | B | 2.09229400  | -1.90270800 | 0.75151900  |
| H | -0.97725200 | -0.77770200 | 3.12957900  | H | 1.40196400  | -2.36395200 | 1.59685200  |
| C | -1.23895500 | 3.43365700  | 2.58548400  | B | 3.78835200  | -1.63774800 | 1.15541600  |
| C | -0.86580400 | 2.18858700  | 2.10451800  | H | 4.25361500  | -1.81586900 | 2.22498300  |
| C | -0.95909100 | 1.89333700  | 0.74253200  | B | 4.13823600  | -0.25125400 | -1.33571900 |
| C | -1.42539100 | 2.88000700  | -0.12992000 | H | 4.90160000  | 0.44074100  | -1.92038500 |
| C | -1.79940300 | 4.12709200  | 0.35861300  | B | 2.43902100  | -0.55075300 | -1.75671700 |
| C | -1.71072000 | 4.40885900  | 1.71430800  | H | 1.97755100  | -0.11647300 | -2.75804100 |
| H | -1.17465900 | 3.63365300  | 3.64883000  | B | 1.97480600  | -2.08746600 | -1.01170800 |
| H | -0.54511400 | 1.43172100  | 2.80893300  | H | 1.16953500  | -2.79742600 | -1.51398700 |
| H | -1.46399300 | 2.69936100  | -1.19537700 | B | 3.37889800  | -2.74866900 | -0.14110300 |
| H | -2.14051800 | 4.88559400  | -0.33626200 | H | 3.56921900  | -3.90716800 | 0.00620500  |
| H | -2.00173200 | 5.38217800  | 2.09069700  | B | 4.71992600  | -1.59842400 | -0.34592300 |
| I | 2.36064400  | 1.78477700  | -1.66710500 | H | 5.87880300  | -1.82182200 | -0.28155200 |
| H | -2.69685800 | -3.80004500 | -0.41550800 | B | 3.60182400  | -1.89923600 | -1.69290200 |
|   |             |             |             | H | 3.96319200  | -2.45537100 | -2.67268700 |

## E2

|    |             |             |             |
|----|-------------|-------------|-------------|
| Pd | -0.34773900 | 0.36521700  | -0.04878200 |
| O  | 0.52294700  | 2.25995600  | -0.08644800 |
| C  | 2.66715200  | -0.33213800 | 1.00942200  |
| C  | 4.18106500  | -0.15389900 | 0.37431200  |
| C  | 2.33716900  | 0.42860400  | 2.27634200  |
| H  | 1.33248000  | 0.15433600  | 2.59569000  |
| H  | 3.03790700  | 0.17916400  | 3.07271100  |
| H  | 2.35958600  | 1.50632000  | 2.11190900  |
| C  | 5.15228400  | 0.77217100  | 1.07683400  |
| H  | 5.97725500  | 0.99873100  | 0.40170300  |
| H  | 4.67453500  | 1.70767200  | 1.37175400  |
| H  | 5.56021300  | 0.29749300  | 1.96830400  |
| C  | 1.63684500  | 2.75815500  | -0.31943700 |
| C  | 1.72860200  | 4.25013500  | -0.45556000 |
| H  | 2.75448900  | 4.61298900  | -0.51294300 |
| H  | 1.19504700  | 4.54667400  | -1.36118900 |
| H  | 1.22667600  | 4.71332800  | 0.39444100  |
| C  | -2.65285500 | 2.58291300  | 0.02866500  |
| H  | -1.81990800 | 3.27721100  | 0.03007200  |
| C  | -3.98262600 | 3.02589500  | 0.02516700  |
| H  | -4.19445100 | 4.08703700  | 0.02576900  |
| C  | -4.99200500 | 2.09573800  | 0.02035900  |
| H  | -6.03150500 | 2.40437900  | 0.01677800  |
| C  | -4.67609900 | 0.72291300  | 0.02082300  |
| C  | -3.31639000 | 0.37573300  | 0.02414500  |
| C  | -2.92232100 | -1.00829500 | 0.03016000  |
| C  | -3.91916400 | -1.99613000 | 0.04359200  |
| C  | -5.30208900 | -1.61236600 | 0.03261800  |
| H  | -6.05093500 | -2.39564500 | 0.03575800  |
| C  | -5.66765300 | -0.31125600 | 0.02036700  |
| H  | -6.71440300 | -0.03069600 | 0.01258600  |
| C  | -3.51427100 | -3.34375900 | 0.07105200  |
| H  | -4.26166700 | -4.12896000 | 0.07895600  |

## TS E2-E3

|    |             |             |             |
|----|-------------|-------------|-------------|
| Pd | 0.16019700  | 0.53609000  | -0.15171200 |
| O  | -0.94565100 | 0.71565100  | -2.04480000 |
| C  | -1.73366700 | -2.20850000 | -0.39353800 |
| C  | -3.36222400 | -2.46496100 | -0.33221300 |
| C  | -1.01386100 | -2.62905400 | -1.65668600 |
| H  | 0.01348800  | -2.88211800 | -1.40532700 |
| H  | -1.48336400 | -3.51030300 | -2.09232400 |
| H  | -0.99759300 | -1.83166900 | -2.39663900 |
| C  | -4.04824500 | -3.04379600 | -1.55201000 |
| H  | -5.12324800 | -2.89569900 | -1.45261900 |
| H  | -3.71120300 | -2.55870500 | -2.46908400 |
| H  | -3.85841500 | -4.11350000 | -1.63293400 |
| C  | -2.12454100 | 0.59237000  | -2.40298900 |
| C  | -2.57736700 | 1.28023900  | -3.65771900 |
| H  | -3.47981900 | 0.84065000  | -4.08316000 |
| H  | -2.77628200 | 2.32873000  | -3.41732400 |
| H  | -1.77105700 | 1.25982000  | -4.38910700 |
| C  | 1.82611600  | -1.01823900 | -2.61617400 |
| H  | 1.08522300  | -0.53189300 | -3.24256600 |
| C  | 2.87686200  | -1.76137300 | -3.16881300 |
| H  | 2.96391400  | -1.86184900 | -4.24282000 |
| C  | 3.78185900  | -2.35113100 | -2.32065100 |
| H  | 4.60428000  | -2.94180800 | -2.70869900 |
| C  | 3.65300500  | -2.17410500 | -0.93026100 |
| C  | 2.57426100  | -1.39424500 | -0.47515800 |
| C  | 2.42749300  | -1.12882900 | 0.93754400  |
| C  | 3.35063300  | -1.70058800 | 1.83129600  |
| C  | 4.42014900  | -2.51783800 | 1.33417700  |
| H  | 5.11418700  | -2.94234000 | 2.05021200  |
| C  | 4.57194100  | -2.74088500 | 0.01139300  |
| H  | 5.39070100  | -3.34700900 | -0.35858400 |
| C  | 3.19744000  | -1.44149300 | 3.20483800  |

|           |             |             |             |                 |             |             |             |
|-----------|-------------|-------------|-------------|-----------------|-------------|-------------|-------------|
| H         | 3.89541400  | -1.87430200 | 3.91260200  | C               | 1.99718200  | 2.45621200  | 3.00669600  |
| C         | 2.16856200  | -0.64240600 | 3.62648000  | H               | 2.05471000  | 2.60513500  | 4.07678200  |
| H         | 2.00847400  | -0.42105300 | 4.67311600  | C               | 2.58407000  | 3.33814000  | 2.12999900  |
| C         | 1.30179900  | -0.10398800 | 2.67305100  | H               | 3.10529300  | 4.21670500  | 2.49319200  |
| H         | 0.47283800  | 0.51565900  | 2.97916500  | C               | 2.54922400  | 3.07073000  | 0.74922300  |
| N         | -3.03188600 | -0.11280900 | -1.70784600 | C               | 1.86276500  | 1.91906700  | 0.33922300  |
| H         | -3.97774900 | -0.07770000 | -2.05834000 | C               | 1.93477300  | 1.48477800  | -1.02431000 |
| N         | 1.67280000  | -0.86167800 | -1.31797200 | C               | 2.68004400  | 2.23424800  | -1.94423300 |
| N         | 1.41890200  | -0.32701200 | 1.37736100  | C               | 3.27374400  | 3.47225300  | -1.52360400 |
| B         | -2.79667100 | -0.82130800 | -0.43416900 | H               | 3.80836800  | 4.05995500  | -2.26047200 |
| B         | -1.30761100 | -0.79583600 | 0.51327000  | C               | 3.21726200  | 3.87269800  | -0.23390500 |
| B         | -1.02807700 | -2.43896200 | 1.13567300  | H               | 3.70609600  | 4.78623600  | 0.08338000  |
| H         | 0.07054200  | -2.87892600 | 1.15352700  | C               | 2.86678300  | 1.69951800  | -3.23098000 |
| B         | -2.32391800 | -3.50250600 | 0.57568100  | H               | 3.43084900  | 2.25818500  | -3.96904100 |
| H         | -2.15520500 | -4.58976900 | 0.14961300  | C               | 2.37631700  | 0.45095600  | -3.51331800 |
| B         | -4.13783100 | -1.27242600 | 0.61500800  | H               | 2.54694900  | -0.02413300 | -4.46978600 |
| H         | -5.21956400 | -0.94344400 | 0.26213300  | C               | 1.64046400  | -0.23436300 | -2.54457100 |
| B         | -2.84733800 | -0.21173100 | 1.21313800  | H               | 1.27106600  | -1.23011300 | -2.73239400 |
| H         | -3.04071400 | 0.93863300  | 1.39534300  | N               | -3.06947400 | -0.78088200 | 1.44716900  |
| B         | -1.75661800 | -1.21155400 | 2.18774000  | H               | -3.98642800 | -1.11067500 | 1.71231900  |
| H         | -1.17891800 | -0.77138900 | 3.11858600  | N               | 1.21118000  | 1.11836300  | 1.20411200  |
| B         | -2.37338200 | -2.87725600 | 2.21439900  | N               | 1.37214900  | 0.28879000  | -1.35912100 |
| H         | -2.21236200 | -3.61583000 | 3.12408500  | B               | -2.97598900 | 0.17377800  | 0.32093800  |
| B         | -3.85410000 | -2.90944900 | 1.23120800  | B               | -1.46437900 | 0.52674800  | -0.50480100 |
| H         | -4.75392600 | -3.67159400 | 1.30788400  | B               | -1.45439000 | 2.26909600  | -0.85652300 |
| B         | -3.50393000 | -1.50033200 | 2.25133300  | H               | -0.46228600 | 2.89870600  | -0.72366400 |
| H         | -4.16290200 | -1.24816200 | 3.20077700  | B               | -2.95166100 | 3.00722100  | -0.26742700 |
| C         | -1.47820300 | 3.30882100  | 2.65560400  | H               | -2.99561900 | 4.03294500  | 0.31412700  |
| C         | -0.45100700 | 2.64101300  | 1.99665100  | B               | -4.33113300 | 0.54460300  | -0.75509000 |
| C         | -0.57467900 | 2.38416200  | 0.63859200  | H               | -5.35319200 | -0.01702200 | -0.55042400 |
| C         | -1.62106900 | 2.93503100  | -0.09572800 | B               | -2.85611000 | -0.17934800 | -1.38705300 |
| C         | -2.63260000 | 3.61046800  | 0.57447100  | H               | -2.89677500 | -1.30701300 | -1.71738600 |
| C         | -2.58063400 | 3.77571600  | 1.95322200  | B               | -1.88073200 | 1.10893400  | -2.12950000 |
| H         | -1.39015000 | 3.49121800  | 3.72037200  | H               | -1.14137000 | 0.91151400  | -3.03604100 |
| H         | 0.45335800  | 2.38814000  | 2.52979700  | B               | -2.78525700 | 2.63524800  | -1.97824000 |
| H         | -1.63172800 | 2.86431800  | -1.17306200 | H               | -2.70480900 | 3.51931200  | -2.75963300 |
| H         | -3.45684700 | 4.02720200  | 0.00672300  | B               | -4.30703700 | 2.27640500  | -1.12931600 |
| H         | -3.37073400 | 4.30701900  | 2.46924000  | H               | -5.32279400 | 2.87767900  | -1.17945600 |
| I         | 1.72437800  | 2.74983500  | -0.61477200 | B               | -3.65307600 | 1.11404300  | -2.29665300 |
| <b>E3</b> |             |             |             | H               | -4.20503600 | 0.89654500  | -3.31982700 |
| Pd        | 0.26503400  | -0.56130700 | 0.14555800  | C               | -1.07385700 | -3.47273400 | -2.77708700 |
| O         | -0.84378700 | -1.18918600 | 1.80210800  | C               | -0.70073200 | -2.27058300 | -2.18127100 |
| C         | -2.20062800 | 1.70355200  | 0.56268000  | C               | -0.36610500 | -2.23814200 | -0.83735300 |
| C         | -3.84412100 | 1.68879300  | 0.39875400  | C               | -0.42344300 | -3.40088700 | -0.07658900 |
| C         | -1.67822900 | 2.06431600  | 1.93646700  | C               | -0.81162700 | -4.59474600 | -0.67702500 |
| H         | -0.83310200 | 2.73985900  | 1.82946100  | C               | -1.13059700 | -4.63754700 | -2.02758900 |
| H         | -2.44113300 | 2.58239900  | 2.51477900  | H               | -1.33774200 | -3.48223900 | -3.82845500 |
| H         | -1.36163300 | 1.18290300  | 2.48778200  | H               | -0.73598900 | -1.36966300 | -2.77879100 |
| C         | -4.70724600 | 1.94973700  | 1.61540400  | H               | -0.11791000 | -3.40486700 | 0.96068600  |
| H         | -5.74382100 | 1.73704500  | 1.35618000  | H               | -0.83029100 | -5.50131300 | -0.08272100 |
| H         | -4.42292800 | 1.31367000  | 2.45518400  | H               | -1.41790500 | -5.57293500 | -2.49238700 |
| H         | -4.64265900 | 2.99227800  | 1.92556700  | I               | 2.62202700  | -1.88596700 | 0.95337500  |
| C         | -2.04790700 | -1.40200700 | 2.05140100  | <b>TS E3-E4</b> |             |             |             |
| C         | -2.35945100 | -2.42893000 | 3.09569800  | Pd              | 0.30495400  | 0.45500000  | -0.23113700 |
| H         | -3.34509200 | -2.29841500 | 3.54253100  | O               | -0.75883600 | 0.67064200  | -2.03331700 |
| H         | -2.31463700 | -3.40811100 | 2.60890900  | C               | -2.09725300 | -1.72449500 | -0.15712200 |
| H         | -1.58852900 | -2.40604000 | 3.86383700  | C               | -3.70873500 | -1.96146700 | -0.36065800 |
| C         | 1.31612100  | 1.34531200  | 2.49885600  | C               | -1.23607800 | -2.35901300 | -1.22775200 |
| H         | 0.84265100  | 0.62155400  | 3.15211200  | H               | -0.33283100 | -2.74477800 | -0.76587500 |

|   |             |             |             |           |             |             |             |
|---|-------------|-------------|-------------|-----------|-------------|-------------|-------------|
| H | -1.75622700 | -3.20260200 | -1.67760800 | H         | -1.51763700 | 2.64141600  | -0.99982300 |
| H | -0.96425300 | -1.65988000 | -2.01102700 | H         | -2.16488800 | 4.75354300  | -0.01283100 |
| C | -4.19319900 | -2.61718000 | -1.63704800 | H         | -2.01368200 | 5.10126800  | 2.44089000  |
| H | -5.27222200 | -2.48416500 | -1.70655200 | I         | 2.33357300  | 2.12544000  | -1.28208100 |
| H | -3.73221700 | -2.17274000 | -2.52003300 |           |             |             |             |
| H | -3.98370900 | -3.68655400 | -1.62900400 | <b>F2</b> |             |             |             |
| C | -1.91894900 | 0.72549300  | -2.47960200 | Pd        | 0.44447600  | 0.36034200  | 0.01688400  |
| C | -2.10544600 | 1.34764500  | -3.83125400 | O         | -0.46913100 | 2.24789600  | 0.04177900  |
| H | -3.08737700 | 1.15465500  | -4.26280700 | C         | -4.02519800 | -0.26975100 | -0.84071300 |
| H | -1.96217900 | 2.42634800  | -3.72499800 | C         | -4.02453000 | -0.25340500 | 0.84533100  |
| H | -1.32422600 | 0.98669600  | -4.49938100 | C         | -5.02680000 | 0.58397100  | -1.59039100 |
| C | 1.70317900  | -1.75775600 | -2.27513300 | H         | -4.50328800 | 1.25203900  | -2.27530400 |
| H | 1.15320500  | -1.25203600 | -3.06164500 | H         | -5.69111100 | -0.05269300 | -2.17258500 |
| C | 2.49962400  | -2.87840400 | -2.54336600 | H         | -5.64145800 | 1.18212700  | -0.91585100 |
| H | 2.57611200  | -3.25396200 | -3.55536500 | C         | -5.03646400 | 0.59622200  | 1.58299000  |
| C | 3.16789600  | -3.48413800 | -1.50620500 | H         | -5.08357800 | 0.24741100  | 2.61395000  |
| H | 3.77904600  | -4.36312100 | -1.67755100 | H         | -4.75021800 | 1.64873800  | 1.60243000  |
| C | 3.09730500  | -2.92609600 | -0.21580700 | H         | -6.03224800 | 0.49730100  | 1.15171400  |
| C | 2.28494300  | -1.79308400 | -0.05372800 | C         | -1.60379500 | 2.74022900  | -0.02960800 |
| C | 2.31283300  | -1.06300200 | 1.18109900  | C         | -1.72678100 | 4.23617800  | -0.07936100 |
| C | 3.17311100  | -1.48288000 | 2.20644700  | H         | -2.75857400 | 4.58263500  | -0.13699700 |
| C | 3.88741700  | -2.71994900 | 2.06034400  | H         | -1.25834900 | 4.65312100  | 0.81361200  |
| H | 4.49687600  | -3.05990900 | 2.88938400  | H         | -1.17575300 | 4.60269800  | -0.94697200 |
| C | 3.85408900  | -3.41286500 | 0.90047700  | N         | -2.72715700 | 2.00895700  | -0.06298600 |
| H | 4.43275800  | -4.32138700 | 0.78204200  | H         | -3.58277200 | 2.53313500  | -0.16243900 |
| C | 3.36720400  | -0.62126900 | 3.30024200  | B         | -2.75791200 | 0.53004600  | -0.02029100 |
| H | 4.02092200  | -0.92131600 | 4.11125900  | B         | -2.43604700 | -0.46844100 | -1.44103800 |
| C | 2.78466400  | 0.62026500  | 3.28486200  | B         | -3.58806900 | -1.81219600 | -1.41829900 |
| H | 2.97366200  | 1.34802200  | 4.06227400  | H         | -4.10071500 | -2.16817100 | -2.42183200 |
| C | 1.92986100  | 0.96356200  | 2.23648300  | B         | -4.61471400 | -1.63539200 | 0.01738100  |
| H | 1.48092700  | 1.94284300  | 2.18071700  | H         | -5.78338500 | -1.80094700 | 0.01703900  |
| N | -3.00513400 | 0.28358900  | -1.82892800 | B         | -2.43926500 | -0.42410600 | 1.43598300  |
| H | -3.88350500 | 0.46092100  | -2.29436200 | H         | -2.18419700 | 0.16713900  | 2.42899400  |
| N | 1.56476600  | -1.26537600 | -1.06223800 | B         | -1.38234300 | -0.57795800 | 0.00017200  |
| N | 1.63065900  | 0.11615700  | 1.26174800  | B         | -1.92117800 | -2.05127500 | -0.86995300 |
| B | -3.06318800 | -0.32990300 | -0.48171400 | H         | -1.18096500 | -2.70709800 | -1.52464300 |
| B | -1.77776300 | -0.14599000 | 0.73230500  | B         | -3.27401900 | -2.78681500 | 0.02793600  |
| B | -1.66674600 | -1.79003700 | 1.48310700  | H         | -3.49024800 | -3.94980700 | 0.04283600  |
| H | -0.60264900 | -2.24337800 | 1.74173600  | B         | -3.58358200 | -1.78098900 | 1.45137700  |
| B | -2.87192800 | -2.91812100 | 0.79999900  | H         | -4.08675600 | -2.11314600 | 2.46754700  |
| H | -2.63129900 | -4.03542200 | 0.50711800  | B         | -1.91895100 | -2.02666200 | 0.90638700  |
| B | -4.61163800 | -0.69625300 | 0.31461100  | H         | -1.17467000 | -2.66422200 | 1.57451900  |
| H | -5.60243300 | -0.38892300 | -0.25708400 | H         | -2.18921300 | 0.10143800  | -2.44830900 |
| B | -3.46232200 | 0.40412700  | 1.07008900  | C         | 2.73507200  | 2.61008400  | 0.04307800  |
| H | -3.70468500 | 1.55798600  | 1.13033500  | H         | 1.89587900  | 3.29668400  | 0.06135300  |
| B | -2.57653700 | -0.51514000 | 2.30621800  | C         | 4.06036800  | 3.06656500  | 0.03681000  |
| H | -2.18616000 | -0.03350000 | 3.30881600  | H         | 4.26205000  | 4.12962800  | 0.05094600  |
| B | -3.19868500 | -2.16545600 | 2.33861700  | C         | 5.07843900  | 2.14630600  | 0.01355500  |
| H | -3.21261700 | -2.82307800 | 3.32144400  | H         | 6.11499700  | 2.46475800  | 0.00809800  |
| B | -4.48504700 | -2.28075700 | 1.11282700  | C         | 4.77532700  | 0.77087500  | -0.00265500 |
| H | -5.39261800 | -3.03644400 | 1.07907200  | C         | 3.41875800  | 0.41027000  | 0.00487500  |
| B | -4.30864900 | -0.80187800 | 2.05683100  | C         | 3.03946000  | -0.97885800 | -0.00845500 |
| H | -5.12358700 | -0.46618300 | 2.84523200  | C         | 4.04724400  | -1.95575500 | -0.02575600 |
| C | -1.23486900 | 3.13212800  | 2.80594700  | C         | 5.42602700  | -1.55737300 | -0.03509700 |
| C | -0.85832700 | 1.92247500  | 2.24351800  | H         | 6.18288700  | -2.33281400 | -0.05006200 |
| C | -0.98545500 | 1.68715500  | 0.87161500  | C         | 5.77771600  | -0.25260300 | -0.02475900 |
| C | -1.45887800 | 2.74091000  | 0.07276300  | H         | 6.82137200  | 0.03945800  | -0.03169000 |
| C | -1.81872100 | 3.95465100  | 0.63197800  | C         | 3.65770100  | -3.30798600 | -0.03177300 |
| C | -1.72160000 | 4.15434700  | 2.00330100  | H         | 4.41399200  | -4.08456600 | -0.04489200 |
| H | -1.15215000 | 3.26937500  | 3.87776500  | C         | 2.32426000  | -3.61774700 | -0.01914900 |
| H | -0.51413800 | 1.13710500  | 2.90008400  |           |             |             |             |

|                 |             |             |             |           |             |             |             |
|-----------------|-------------|-------------|-------------|-----------|-------------|-------------|-------------|
| H               | 1.97772800  | -4.64261700 | -0.02121100 | C         | -1.85120300 | 3.72506700  | -1.96229900 |
| C               | 1.38114400  | -2.58419200 | -0.00386300 | H         | -1.46511200 | 4.47913100  | -2.63575000 |
| H               | 0.32817500  | -2.81373100 | 0.00593700  | C         | -1.17247300 | 2.50780700  | -1.82076900 |
| N               | 2.42913800  | 1.32813000  | 0.02728200  | H         | -0.26166800 | 2.32736200  | -2.37670500 |
| N               | 1.71091600  | -1.30232000 | -0.00082600 | N         | -2.64082900 | -0.62217300 | 0.28564800  |
| <b>TS F2-F3</b> |             |             |             | N         | -1.57178500 | 1.53949900  | -1.02103600 |
| Pd              | -0.32050000 | -0.35953500 | -0.22583500 | C         | 0.57115900  | -3.19429900 | 2.56431800  |
| O               | -0.30479300 | 0.79716300  | 1.79293800  | C         | -0.10887200 | -2.58969900 | 1.50933700  |
| C               | 4.03357400  | 1.05648000  | 0.56010600  | C         | 0.48815700  | -2.53203600 | 0.25076400  |
| C               | 3.27137000  | 2.46020500  | 0.07845900  | C         | 1.72923800  | -3.13667400 | 0.04328000  |
| C               | 4.92537400  | 1.07794600  | 1.78530000  | C         | 2.37436500  | -3.76654900 | 1.09444600  |
| H               | 4.65926300  | 0.25138700  | 2.44538900  | C         | 1.80550500  | -3.79093300 | 2.36281300  |
| H               | 5.96768700  | 0.96075900  | 1.49318300  | H         | 0.10671600  | -3.20986600 | 3.54379500  |
| H               | 4.83407200  | 2.01455300  | 2.33787100  | H         | -1.07191500 | -2.14787500 | 1.70773400  |
| C               | 3.47629600  | 3.72746500  | 0.87838100  | H         | 2.18813000  | -3.13051400 | -0.93459500 |
| H               | 3.09880800  | 4.56546600  | 0.29375800  | H         | 3.32921200  | -4.24586200 | 0.91251700  |
| H               | 2.92574500  | 3.69827400  | 1.81967900  | H         | 2.31287400  | -4.28732300 | 3.18128900  |
| H               | 4.53270700  | 3.90544100  | 1.07817500  | I         | -0.57178600 | -2.46078400 | -1.87335400 |
| C               | 0.57717400  | 1.12944700  | 2.57917200  | <b>F3</b> |             |             |             |
| C               | 0.26261500  | 1.29168200  | 4.04165700  | Pd        | -0.31744100 | -0.30313500 | -0.12732100 |
| H               | 1.00584800  | 1.88112500  | 4.57985900  | O         | -0.08722000 | 0.16664600  | 1.99597200  |
| H               | -0.71701500 | 1.75679500  | 4.14195200  | C         | 4.22194900  | 0.45875300  | 0.61361900  |
| H               | 0.20791900  | 0.29676800  | 4.49121000  | C         | 3.55404800  | 1.98145100  | 0.73732200  |
| N               | 1.86101700  | 1.34289900  | 2.19568500  | C         | 5.17919800  | -0.02414500 | 1.68472400  |
| H               | 2.51325200  | 1.53311900  | 2.94053200  | H         | 4.84453600  | -0.98797100 | 2.07100700  |
| B               | 2.34527300  | 1.17563600  | 0.81615600  | H         | 6.17320800  | -0.15471500 | 1.26009600  |
| B               | 3.07841300  | -0.31345000 | 0.21798500  | H         | 5.25691900  | 0.68376000  | 2.51162200  |
| B               | 4.45808600  | 0.11039800  | -0.79738600 | C         | 3.90519300  | 2.85173900  | 1.92357900  |
| H               | 5.46073600  | -0.51048900 | -0.71956800 | H         | 3.52217800  | 3.85417300  | 1.73652100  |
| B               | 4.58845300  | 1.87840200  | -0.84821300 | H         | 3.44606200  | 2.48397700  | 2.84205700  |
| H               | 5.60932500  | 2.46213400  | -0.75005500 | H         | 4.98392100  | 2.92315300  | 2.05962700  |
| B               | 1.76064000  | 2.10272200  | -0.57452500 | C         | 0.86357400  | 0.14638100  | 2.78801400  |
| H               | 0.91464600  | 2.89427400  | -0.35023700 | C         | 0.58471400  | -0.06747400 | 4.24705000  |
| B               | 1.59201600  | 0.31948500  | -0.54452100 | H         | 1.39415600  | 0.27510300  | 4.89214100  |
| B               | 2.91447900  | -0.34497500 | -1.54220000 | H         | -0.34018400 | 0.44403100  | 4.50895100  |
| H               | 2.80363300  | -1.35988900 | -2.13872700 | H         | 0.43312000  | -1.13867800 | 4.40832300  |
| B               | 3.85957900  | 1.01254600  | -2.20295600 | N         | 2.14625500  | 0.27709400  | 2.40513700  |
| H               | 4.41428100  | 0.96570200  | -3.24614300 | H         | 2.83390300  | 0.15382300  | 3.13261400  |
| B               | 3.13129900  | 2.51733200  | -1.61737700 | B         | 2.56895200  | 0.56953500  | 1.02251100  |
| H               | 3.18399400  | 3.58585700  | -2.12001600 | B         | 3.14194600  | -0.64232200 | -0.12625800 |
| B               | 2.08796600  | 1.14715200  | -2.03786100 | B         | 4.48664500  | 0.05773400  | -1.02558900 |
| H               | 1.38114200  | 1.19340800  | -2.98777700 | H         | 5.43548300  | -0.60478700 | -1.26344800 |
| H               | 3.16101400  | -1.17606500 | 1.01562000  | B         | 4.76356000  | 1.70884600  | -0.44349600 |
| C               | -3.24993600 | -1.70153400 | 0.73947300  | H         | 5.83146800  | 2.16122900  | -0.22635000 |
| H               | -2.72596500 | -2.64340000 | 0.61429300  | B         | 1.98200300  | 1.97677700  | 0.12228700  |
| C               | -4.50920800 | -1.68191700 | 1.35026100  | H         | 1.20792400  | 2.67038600  | 0.68539800  |
| H               | -4.94711900 | -2.60392300 | 1.70956100  | B         | 1.66809200  | 0.31973300  | -0.47519000 |
| C               | -5.15440100 | -0.47922500 | 1.47998800  | B         | 2.86879000  | -0.00936900 | -1.75516700 |
| H               | -6.12431600 | -0.41358500 | 1.96057200  | H         | 2.64728400  | -0.73733500 | -2.65907400 |
| C               | -4.56780400 | 0.67968300  | 0.94054800  | B         | 3.88552500  | 1.44317500  | -1.95336800 |
| C               | -3.30423300 | 0.55565700  | 0.33186700  | H         | 4.37642800  | 1.75137300  | -2.98361700 |
| C               | -2.74318100 | 1.69440800  | -0.36262000 | B         | 3.32347700  | 2.66740800  | -0.80295500 |
| C               | -3.48133700 | 2.89150700  | -0.41585500 | H         | 3.43462600  | 3.84122900  | -0.88417800 |
| C               | -4.71875600 | 3.00707700  | 0.29981900  | B         | 2.14595200  | 1.61238700  | -1.60564900 |
| H               | -5.24272900 | 3.95578700  | 0.27613800  | H         | 1.39420500  | 2.05554800  | -2.40490000 |
| C               | -5.23972500 | 1.94650500  | 0.95207900  | H         | 3.21765800  | -1.74576300 | 0.28098700  |
| H               | -6.19195000 | 2.02307800  | 1.46429500  | C         | -2.91423600 | -2.11021100 | 0.69762400  |
| C               | -2.99056600 | 3.92993700  | -1.22915400 | H         | -2.22084400 | -2.92372100 | 0.51434600  |
| H               | -3.53587700 | 4.86536100  | -1.29099000 | C         | -4.21277900 | -2.35910000 | 1.16042100  |

|   |             |             |             |   |             |             |             |
|---|-------------|-------------|-------------|---|-------------|-------------|-------------|
| H | -4.53218700 | -3.37783600 | 1.33663800  | B | -4.81991700 | 0.20044600  | -0.61389800 |
| C | -5.05253900 | -1.29625800 | 1.37627100  | H | -5.85041500 | 0.77151000  | -0.52514400 |
| H | -6.06347200 | -1.44931600 | 1.73765200  | B | -4.85079800 | -1.56767000 | -0.68410500 |
| C | -4.60420900 | 0.00994500  | 1.10281700  | H | -5.83445500 | -2.21110000 | -0.58344900 |
| C | -3.28651200 | 0.16085100  | 0.63782100  | B | -2.00797600 | -1.62243100 | -0.43124700 |
| C | -2.80766200 | 1.47208000  | 0.26752200  | H | -1.13055000 | -2.38732300 | -0.22915100 |
| C | -3.68206100 | 2.56894400  | 0.36250200  | B | -1.93068600 | 0.18809900  | -0.36331500 |
| C | -5.00256900 | 2.38738500  | 0.89264500  | B | -3.31073500 | 0.75466100  | -1.36813900 |
| H | -5.64670700 | 3.25483900  | 0.97931100  | H | -3.29166800 | 1.78291100  | -1.94696200 |
| C | -5.44472400 | 1.16222600  | 1.24985500  | B | -4.17627300 | -0.64885800 | -2.03101900 |
| H | -6.44943500 | 1.02557700  | 1.63286300  | H | -4.74000500 | -0.61990600 | -3.06960100 |
| C | -3.22719300 | 3.81412500  | -0.10837300 | B | -3.36115400 | -2.10857600 | -1.46055200 |
| H | -3.87954700 | 4.67848100  | -0.05088000 | H | -3.34020400 | -3.17560400 | -1.96801700 |
| C | -1.97851200 | 3.90758100  | -0.66582200 | B | -2.39666300 | -0.67809700 | -1.88057000 |
| H | -1.60573500 | 4.83742300  | -1.07447500 | H | -1.69453400 | -0.70616200 | -2.82918600 |
| C | -1.17200700 | 2.76487000  | -0.70790200 | H | -3.60321800 | 1.59711500  | 1.16889700  |
| H | -0.19087800 | 2.80705500  | -1.16003400 | C | 2.74582000  | 1.96344200  | 1.53826600  |
| N | -2.46198200 | -0.89396000 | 0.46440000  | H | 1.97561500  | 2.72830000  | 1.59022200  |
| N | -1.55186100 | 1.59512000  | -0.22868700 | C | 3.99726700  | 2.15221800  | 2.14486800  |
| C | 0.71267100  | -4.01274600 | 1.60068100  | H | 4.20885300  | 3.07314100  | 2.67286000  |
| C | 0.24925600  | -2.72799200 | 1.32600000  | C | 4.93468600  | 1.15473100  | 2.04382600  |
| C | 0.44811200  | -2.16325200 | 0.06661500  | H | 5.91411700  | 1.26400800  | 2.49646500  |
| C | 1.08738400  | -2.90675600 | -0.92043600 | C | 4.62565100  | -0.02105500 | 1.33284200  |
| C | 1.54004800  | -4.19057200 | -0.64051200 | C | 3.34392900  | -0.11043800 | 0.76309400  |
| C | 1.36361400  | -4.74661500 | 0.61961600  | C | 2.98748600  | -1.28235400 | -0.00824000 |
| H | 0.54983600  | -4.43935600 | 2.58450200  | C | 3.94007900  | -2.30335300 | -0.17937400 |
| H | -0.28636600 | -2.19079000 | 2.09868300  | C | 5.23109000  | -2.18639100 | 0.43749700  |
| H | 1.25761600  | -2.49424900 | -1.90373300 | H | 5.94285400  | -2.99173600 | 0.29700900  |
| H | 2.03794100  | -4.75463200 | -1.42096500 | C | 5.56031800  | -1.09524000 | 1.16238800  |
| H | 1.72153800  | -5.74721300 | 0.83127000  | H | 6.54062000  | -1.00812700 | 1.61680600  |
| I | -0.80254200 | -0.61128900 | -2.66651800 | C | 3.58888900  | -3.40536700 | -0.97825600 |

## TS F3-F4

|    |             |             |             |   |             |             |             |
|----|-------------|-------------|-------------|---|-------------|-------------|-------------|
| Pd | 0.29532000  | 0.19884900  | -0.18034100 | C | 2.35325000  | -3.44529500 | -1.57385900 |
| O  | 0.10488900  | -0.84425300 | 1.77275500  | H | 2.05718400  | -4.26443800 | -2.21555000 |
| C  | -4.33256300 | -0.72206600 | 0.73362000  | C | 1.46570700  | -2.38968600 | -1.35194500 |
| C  | -3.49901700 | -2.07224600 | 0.23143000  | H | 0.49246700  | -2.37471400 | -1.82668600 |
| C  | -5.21561100 | -0.81049900 | 1.96259100  | N | 2.43355800  | 0.86966000  | 0.87951300  |
| H  | -5.13813200 | 0.11786600  | 2.52924400  | N | 1.76214900  | -1.35670500 | -0.58046100 |
| H  | -6.25595600 | -0.94875700 | 1.67257800  | C | -1.09160600 | 3.39326400  | 2.13932100  |
| H  | -4.93512300 | -1.64422700 | 2.60941500  | C | -0.81877200 | 2.12409900  | 1.65487400  |
| C  | -3.62534400 | -3.35086000 | 1.02858700  | C | -0.88214100 | 1.83674600  | 0.27979700  |
| H  | -3.22721100 | -4.16891800 | 0.42956700  | C | -1.19009900 | 2.89226500  | -0.58755900 |
| H  | -3.05609400 | -3.30134400 | 1.95771500  | C | -1.47122800 | 4.16093200  | -0.10069100 |
| H  | -4.66796100 | -3.57383200 | 1.25422200  | C | -1.43093700 | 4.41729800  | 1.26218200  |
| C  | -0.78097700 | -1.05530400 | 2.60530200  | H | -1.03220800 | 3.58352400  | 3.20504900  |
| C  | -0.38883900 | -1.42037500 | 4.00866300  | H | -0.53449500 | 1.36016900  | 2.36318700  |
| H  | -1.22621600 | -1.76325500 | 4.61668800  | H | -1.23804500 | 2.72180100  | -1.65209900 |
| H  | 0.37523300  | -2.19644900 | 3.96508400  | H | -1.72084600 | 4.95116300  | -0.79874900 |
| H  | 0.06242400  | -0.54344900 | 4.47910400  | H | -1.65083700 | 5.40903500  | 1.63971100  |
| N  | -2.09740700 | -0.94204700 | 2.32648300  | I | 0.95133200  | 1.10078100  | -2.54950100 |
| H  | -2.72175000 | -1.04019500 | 3.11225100  |   |             |             |             |
| B  | -2.63917200 | -0.73653500 | 0.97083700  |   |             |             |             |
| B  | -3.46670100 | 0.71611300  | 0.39440800  |   |             |             |             |
